1 **Sewer Transport Conditions and Their Role in the Decay of Endogenous SARS-CoV-2 and**  
2 **Pepper Mild Mottle Virus from Source to Collection**

3 Élisabeth Mercier<sup>a</sup>, Patrick M. D'Aoust<sup>a</sup>, Walaa Eid<sup>b</sup>, Nada Hegazy<sup>a</sup>, Pervez Kabir<sup>a</sup>, Shen Wan<sup>a</sup>, Lakshmi Pisharody<sup>a</sup>,  
4 Elizabeth Renouf<sup>a</sup>, Sean Stephenson<sup>b</sup>, Tyson E. Graber<sup>b</sup>, Alex E. MacKenzie<sup>b</sup>, Robert Delatolla<sup>a</sup>

5 a: Department of Civil Engineering, University of Ottawa, Ottawa, Canada, K1N 6N5

6 b: Children's Hospital of Eastern Ontario Research Institute, Ottawa, Canada, K1H 8L1

7  
8 Corresponding author:

9 **Dr. Robert Delatolla**

10 Professor

11 Work E-mail: [robert.delatolla@uOttawa.ca](mailto:robert.delatolla@uOttawa.ca)

12 Full postal address: Colonel By Hall, Room A108, 161 Louis-Pasteur, University of Ottawa, Ottawa, ON K1N 6N5,  
13 Canada

14  
15  
16  
17  
18  
19  
20  
21  
22  
23  
24  
25  
26  
27  
28  
29  
30  
31  
32  
33  
34  
35  
36  
37  
38  
39  
40

## 41 **Abstract**

42 This study presents a comprehensive analysis of the decay patterns of endogenous SARS-CoV-2 and Pepper mild  
43 mottle virus (PMMoV) within wastewaters spiked with stool from infected patients expressing COVID-19 symptoms,  
44 and hence explores the decay of endogenous SARS-CoV-2 and PMMoV targets in wastewaters from source to  
45 collection of the sample. Stool samples from infected patients were used as endogenous viral material to more  
46 accurately mirror real-world decay processes compared to more traditionally used lab-propagated spike-ins. As such,  
47 this study includes data on early decay stages of endogenous viral targets in wastewaters that are typically overlooked  
48 when performing decay studies on wastewaters harvested from wastewater treatment plants that contain already-  
49 degraded endogenous material. The two distinct sewer transport conditions of dynamic suspended sewer transport  
50 and bed and near-bed sewer transport were simulated in this study at temperatures of 4°C, 12°C and 20°C to elucidate  
51 decay under these two dominant transport conditions within wastewater infrastructure. The dynamic suspended sewer  
52 transport was simulated over 35 hours, representing typical flow conditions, whereas bed and near-bed transport  
53 extended to 60 days to reflect the prolonged settling of solids in sewer systems during reduced flow periods. In dynamic  
54 suspended sewer transport, no decay was observed for SARS-CoV-2, PMMoV, or total RNA over the 35-hour period,  
55 and temperature ranging from 4°C to 20°C had no noticeable effect. Conversely, experiments simulating bed and near-  
56 bed transport conditions revealed significant decreases in SARS-CoV-2 and total RNA concentrations by day 2, and  
57 PMMoV concentrations by day 3. Only PMMoV exhibited a clear trend of increasing decay constant with higher  
58 temperatures, suggesting that while temperature influences decay dynamics, its impact may be less significant than  
59 previously assumed, particularly for endogenous RNA that is bound to dissolved organic matter in wastewater. First  
60 order decay models were inadequate for accurately fitting decay curves of SARS-CoV-2, PMMoV, and total RNA in  
61 bed and near-bed transport conditions. F-tests confirmed the superior fit of the two-phase decay model compared to  
62 first order decay models across temperatures of 4°C to 20°C. Finally, and most importantly, total RNA normalization  
63 emerged as an appropriate approach for correcting the time decay of SARS-CoV-2 exposed to bed and near-bed  
64 transport conditions. These findings highlight the importance of considering decay from the point of entry in the sewers,  
65 sewer transport conditions, and normalization strategies when assessing and modelling the impact of viral decay rates  
66 in wastewater systems. This study also emphasizes the need for ongoing research into the diverse and multifaceted  
67 factors that influence these decay rates, which is crucial for accurate public health monitoring and response strategies.

68 **Keywords:** Decay rate; persistence testing; degradation testing; stool spike-in; wastewater-based surveillance; bed  
69 transport.

## 70 1. Introduction

71 In late 2019, SARS-CoV-2 virus was first detected in the Hubei province of China (Huang et al., 2020; Xiantian  
72 et al., 2020). The pandemic saw a global scientific advancement of wastewater-based surveillance (WBS), the  
73 surveillance of wastewater to detect and quantify pathogens in wastewaters and to assess transmission of disease in  
74 communities (Brouwer et al., 2018; Diamond et al., 2022; Michael-Kordatou et al., 2020; O'Reilly et al., 2020; Park et  
75 al., 2020; Peccia et al., 2020; Xu et al., 2020). Since the advancement of WBS, strong correlations have been reported  
76 between measured SARS-CoV-2 viral RNA concentrations in municipal wastewaters and traditional public health  
77 metrics used to monitor the pandemic's progress, such as new daily reported clinical cases, percent positivity of clinical  
78 tests, hospitalization admissions and deaths caused by COVID-19 complications (Ahmed et al., 2020a; D'Aoust et al.,  
79 2022, 2021a; Hegazy et al., 2022; Keshaviah et al., 2023; Kumar et al., 2020; La Rosa et al., 2020; Randazzo et al.,  
80 2020; Thompson et al., 2020). As a result, SARS-CoV-2 WBS has since been applied at scale in over 4,648 sites, in  
81 at least 72 countries worldwide (Naughton et al., 2023), to help governmental agencies and public health organizations.

82 Significant efforts and developments have been made to improve the measurement of SARS-CoV-2 in  
83 wastewaters and specifically to increase the sensitivity of assays (Pecson et al., 2021). While several comprehensive  
84 reviews and analyses on laboratory methodologies have been performed, resulting in improved and robust testing  
85 methodologies, there still exists a lack of fundamental understanding of the impacts of sewershed-induced decay on  
86 viral signal measurements. In particular, the effects of short, moderate and long sewer transport, and the presence of  
87 industrial waste or chemical disinfectants on measured viral titers of SARS-CoV-2 have not yet been well elucidated,  
88 and limited literature currently exists on these topics (Parra-Arroyo et al., 2023). Furthermore, at the time of writing,  
89 only a limited number of studies (9) have attempted to elucidate decay kinetics of SARS-CoV-2 viral signal in  
90 wastewaters (Ahmed et al., 2020b; Babler et al., 2023; Bivins et al., 2020; de Oliveira et al., 2021; Hart et al., 2023;  
91 Hokajärvi et al., 2021; Roldan-Hernandez et al., 2022; Sala-Comorera et al., 2021; Weidhaas et al., 2021; Yang et al.,  
92 2022), with the reported decay kinetics of the existing studies investigating SARS-CoV-2 viral decay shown in Table 1.  
93 Six out of ten studies employed spiked-in SARS-CoV-2 viral particles as opposed to studying endogenous SARS-CoV-  
94 2 already present in wastewater. This distinction is significant as the decay rates between endogenous, fecally shed,  
95 SARS-CoV-2 RNA in wastewater samples, and lab-propagated SARS-CoV-2 virions, remain largely unexplored and  
96 not well understood (Kantor et al., 2021). It is hypothesized that spiked-in SARS-CoV-2 viral particles may decay faster  
97 than their endogenous counterparts, as endogenous SARS-CoV-2 has been observed to bind to dissolved organic  
98 matter in wastewater matrices leading to slower degradation and increased persistence in the environment (Chatterjee  
99 et al., 2023). To best elucidate the decay kinetics of SARS-CoV-2 viral signal in sewers and wastewaters, an

100 endogenous material spike-in approach using infected stool from patients is likely best to limit confounding factors from  
 101 inherent differences between endogenous SARS-CoV-2 RNA and lab-propagated SARS-CoV-2 virions that impact the  
 102 interpretation of results. Further, a spike-in approach using infected stool would enable decay to be quantified from the  
 103 time that the viral titers enter the wastewater matrix, enabling the true decay profile to be analyzed from source to point  
 104 of collection.

105 The current range of endogenous decay rates from SARS-CoV-2 positive wastewaters reported in literature  
 106 is broad, with  $T_{90}$  ranging from 2.4 to 154.9 days at 4°C, Table 1 (Roldan-Hernandez et al., 2022; Weidhaas et al.,  
 107 2021; Yang et al., 2022). While this wide range of values could be somewhat explained by the varying type of starting  
 108 material, it calls for further investigation into factors such as wastewater matrix composition, titer of the target, and the  
 109 type of transport the target is subjected to in the sewer system. Additionally, it's important to note that existing studies  
 110 using endogenous samples have primarily focused on the decay of endogenous viruses in wastewater samples  
 111 collected at treatment plants. This approach introduces a significant bias, as these samples have already undergone  
 112 decay during their residence time in the sewer system, which can extend to more than a day depending on the system,  
 113 in addition to the holding time prior to the experiment. Consequently, current decay studies may not accurately include  
 114 the initial decay of the virus titers from the source of entry in the system (such as a toilet flush), leading to a biased  
 115 understanding of the decay kinetics. Furthermore, existing studies do not incorporate considerations for different flow  
 116 dynamics existing in the sewersheds, as all studies to date on SARS-CoV-2 viral signal decay in wastewater have been  
 117 performed in a manner that most closely mimics bed and near-bed sewer transport, which could impact the  
 118 interpretation of results, and might be limiting WBS applications such as public health reporting, or modelling.

119 **Table 1: SARS-CoV-2 decay study temperatures, decay kinetics and associated  $T_{90}$**

| Target virus/pathogen | Type of sample utilized for decay studies                                | Temperature at which study was performed (°C) | $k$ (day <sup>-1</sup> ) | $T_{90}$ (days) | Reference                       |
|-----------------------|--------------------------------------------------------------------------|-----------------------------------------------|--------------------------|-----------------|---------------------------------|
| SARS-CoV-2 (N-gene)   | Spiked-in RNA in influent wastewater                                     | 4                                             | 0.084                    | 27.8            | (Ahmed et al., 2020b)           |
|                       |                                                                          | 15                                            | 0.114                    | 20.4            |                                 |
|                       |                                                                          | 25                                            | 0.183                    | 12.6            |                                 |
|                       |                                                                          | 37                                            | 0.286                    | 8.0             |                                 |
|                       |                                                                          | 4                                             | 0.054                    | 43.2            |                                 |
| SARS-CoV-2 (N-gene)   | Spiked-in RNA in autoclaved influent wastewater                          | 15                                            | 0.077                    | 29.9            | (Roldan-Hernandez et al., 2022) |
|                       |                                                                          | 25                                            | 0.171                    | 13.5            |                                 |
|                       |                                                                          | 37                                            | 0.405                    | 5.7             |                                 |
| SARS-CoV-2 (N-gene)   | Spiked-in virus (high-titer) in frozen, then thawed, influent wastewater | 20                                            | 1.100                    | 1.6             | (Roldan-Hernandez et al., 2022) |
| SARS-CoV-2 (N-gene)   | Spiked-in virus (low-titer) in frozen, then thawed, influent wastewater  | 20                                            | 1.400                    | 2.1             |                                 |

|                                           |                                                                   |    |        |       |                                 |
|-------------------------------------------|-------------------------------------------------------------------|----|--------|-------|---------------------------------|
| <b>SARS-CoV-2 (N-gene)</b>                | Spiked-in RNA in influent wastewater                              | 4  | 0.060  | 36.0  | (Hokajärvi et al., 2021)        |
| <b>SARS-CoV-2 (N-gene)</b>                | Spiked-in RNA in influent wastewater                              | 4  | 0.190  | 7.7   | (de Oliveira et al., 2021)      |
|                                           |                                                                   | 24 | 0.830  | 1.9   |                                 |
| <b>SARS-CoV-2 (N-gene)</b>                | Endogenous SARS-CoV-2 in influent wastewater                      | 4  | 0.960  | 2.4   | (Weidhaas et al., 2021)         |
|                                           |                                                                   | 10 | 2.160  | 1.1   |                                 |
|                                           |                                                                   | 35 | 4.320  | 0.5   |                                 |
| <b>SARS-CoV-2 (average of N1-N2-gene)</b> | Endogenous SARS-CoV-2 collected from wastewater treatment plant A | 4  | 0.0175 | 154.9 | (Roldan-Hernandez et al., 2022) |
|                                           |                                                                   | 22 | 0.0240 | 96.6  |                                 |
|                                           |                                                                   | 37 | 0.0550 | 43.0  |                                 |
|                                           |                                                                   | 4  | 0.034  | 70.0  |                                 |
| <b>SARS-CoV-2 (average of N1-N2-gene)</b> | Endogenous SARS-CoV-2 collected from wastewater treatment plant B | 22 | 0.076  | 31.3  |                                 |
|                                           |                                                                   | 37 | 0.095  | 24.4  |                                 |
| <b>SARS-CoV-2 (N-gene)</b>                | Endogenous SARS-CoV-2 in influent wastewater                      | 4  | 0.134  | 17.2  | (Yang et al., 2022)             |
|                                           |                                                                   | 26 | 0.274  | 7.7   |                                 |
| <b>SARS-CoV-2 (N-gene)</b>                | Endogenous SARS-CoV-2 in sterilized river water                   | 4  | 0.610  | 3.8   | (Sala-Comorera et al., 2021)    |
|                                           |                                                                   | 20 | 1.010  | 2.3   |                                 |
| <b>SARS-CoV-2 (N-gene)</b>                | Endogenous SARS-CoV-2 in sterilized seawater                      | 4  | 1.070  | 2.2   |                                 |
|                                           |                                                                   | 20 | 2.020  | 1.1   |                                 |
| <b>SARS-CoV-2 (N-gene)</b>                | Endogenous SARS-CoV-2 in influent wastewater                      | 22 | 0.710  | 3.2   | (Babler et al., 2023)           |
| <b>SARS-CoV-2 (average of N1-N2-gene)</b> | Endogenous SARS-CoV-2 in influent wastewater                      | 25 | 0.280  | 8.2   | (Hart et al., 2023)             |
|                                           |                                                                   | 35 | 0.349  | 6.6   |                                 |

\* calculated from decay rate data presented by reference

120

121

122

123

124

125

126

127

128

129

130

A common fecal biomarker, pepper mild mottle virus (PMMoV), has been used by approximately 30% of SARS-CoV-2 surveillance systems worldwide to normalize reported viral signal to the quantity of fecal matter in the samples (D'Aoust et al., 2021a; Feng et al., 2021; Haramoto et al., 2013; Kitajima et al., 2018; Naughton et al., 2023). As fecal normalization with PMMoV directly impacts reported normalized SARS-CoV-2 viral signal measurements, it is equally important to understand the effects of decay on PMMoV, if any, throughout the sewershed. The reported decay kinetics of the existing studies investigating PMMoV viral decay are shown below in Table 2. Similar to SARS-CoV-2, the current range of decay rates reported for PMMoV is quite broad, ranging from 57.6 to 237 days at 4°C raising the same concern for further investigation.

131

**Table 2:** PMMoV decay study temperatures, decay kinetics and associated T<sub>90</sub>.

| Target virus/pathogen   | Type of sample utilized for decay studies    | Temperature at which study was performed (°C) | k (day <sup>-1</sup> ) | T <sub>90</sub> (days) | Reference                       |
|-------------------------|----------------------------------------------|-----------------------------------------------|------------------------|------------------------|---------------------------------|
| <b>PMMoV (RAP-gene)</b> | Endogenous PMMoV in wastewater/wetland water | 4                                             | 0.040                  | 57.6*                  | (Rachmadi, 2016)                |
|                         |                                              | 25                                            | 0.050                  | 46.1*                  |                                 |
|                         |                                              | 37                                            | 0.080                  | 28.8*                  |                                 |
| <b>PMMoV (RAP-gene)</b> | Endogenous PMMoV in river water              | 20                                            | 0.228**                | 10.2                   | (Sala-Comorera et al., 2021)    |
| <b>PMMoV (RAP-gene)</b> | Endogenous PMMoV in wastewater (WRRF 1)      | 4                                             | 0.010                  | 237.4                  | (Roldan-Hernandez et al., 2022) |
|                         |                                              | 22                                            | 0.040                  | 57.2                   |                                 |
|                         |                                              | 37                                            | 0.045                  | 51.7                   |                                 |
| <b>PMMoV (RAP-gene)</b> | Endogenous PMMoV in wastewater (WRRF 2)      | 4                                             | 0.059                  | 39.0                   | (Babler et al., 2023)           |
|                         |                                              | 22                                            | 0.077                  | 30.1                   |                                 |
|                         |                                              | 37                                            | 0.091                  | 25.3                   |                                 |
| <b>PMMoV (RAP-gene)</b> | Endogenous PMMoV in influent wastewater      | 22                                            | 0.453                  | 5.1*                   | (Babler et al., 2023)           |

132

WRRF = Water Resource Recovery Facility, \* calculated from decay rate data presented by reference, \*\* calculated from data presented by Sala-Comorera (2021)

133 Other normalizers used in WBS studies include various RNA targets. RNA viruses have commonly been used  
 134 as spiked-in controls for assessing extraction efficiency in WBS studies (Torii et al., 2022). Additionally, RNA extracts  
 135 have been employed as spike-in inhibition controls during the qPCR step of sample processing (Ahmed et al., 2020c).  
 136 Given its established role as a control in extraction and qPCR processes, RNA's utility in wastewater surveillance is  
 137 well recognized. This role, coupled with the established prevalence of human-associated viruses and bacteria-infecting  
 138 viruses contributing to the urban virome in sewage, supports total RNA concentration as a robust candidate for  
 139 normalizing against decay and temperature effects (Guajardo-Leiva et al., 2020; Nieuwenhuijse et al., 2020; Tisza et  
 140 al., 2023). The presence of diverse RNA families in sewage indicates that this normalization technique could be  
 141 effective for multiple endogenous sewage viral targets, particularly if they exist in sewage primarily as components of  
 142 broken virions, rather than as intact virions with various structural properties.

143 Numerous concurrent biological processes occur in wastewater sewers, these processes may include both  
 144 aerobic and anoxic/anaerobic biochemical reactions, depending on flow conditions. Two of the most common flow  
 145 conditions associated with constituent transport in sewers are: i) dynamic suspended sewer transport, and ii) bed and  
 146 near-bed transport. Dynamic suspended sewer transport conditions occur during conventional, dynamic, design-flow  
 147 conditions within the sewers and are characterized as quasi-fully mixed flows with suspended solids transport. This  
 148 transport condition occurs during conventional weather and during conventional downstream operation of wastewater  
 149 treatment facilities. It is distinguished from other modes of sewer transport conditions by the lack of pronounced solids  
 150 deposition and a high degree of oxygen entrainment into the liquid sewage matrix, creating semi-aerobic to aerobic

151 conditions, along with significant particle movement (Bertrand-Krajewski et al., 2010; Qteishat et al., 2011).  
152 Wastewaters that are subjected to dynamic suspended sewer transport remain within the sewershed for the design  
153 residence time of the sewershed, with conventional sewersheds rarely exceeding past a few days of residence time.  
154 Bed and near-bed transport conditions are characterized by an accumulation of deposited wastewater solids within the  
155 sewershed and is caused by relatively low flow velocities of the wastewaters, with the flow velocities falling below those  
156 required for continued solids suspension (Bertrand-Krajewski et al., 2010). Bed and near-bed transport conditions are  
157 cyclical in nature, and most often occur in regions of the sewershed where flow velocities are unable to be constantly  
158 maintained in a manner ensuring suspended sewer transport conditions (Ashley and Crabtree, 1992; CRABTREE,  
159 1989; Lange and Wichern, 2013). Notably, this phenomenon occurs in seasonal climates where yearly cycles of low  
160 and high rainfall seasons are present. Similarly, in northern and cold climate countries, precipitation accumulates as  
161 snow and ice during colder months, representing periods of low flow and sedimentation for months, until the warmer  
162 months bring increased flow, thus reinstating higher velocity conditions in the sewers. Finally, within some  
163 municipalities, bed and near-bed transport conditions may be induced when the sewers are used to store wastewaters  
164 during maintenance activities at the downstream wastewater treatment facility.

165 A limited understanding of the persistence and degradation of viral material in wastewaters remains due to a  
166 lack of decay studies that use infected stool spiked into wastewaters and hence studies that investigate of decay rates  
167 from the time of individual contributions to community-level sampling. This considerable limitation in our current  
168 knowledge coupled with the significant variation in reported decay rates of spiked-in SARS-CoV-2 viral particles studies  
169 and endogenous SARS-CoV-2 already present in wastewater studies warrants further investigation of the persistence  
170 and degradation of endogenous SARS-CoV-2 viral material in wastewaters. Our study addresses these gaps by  
171 examining the decay rates of SARS-CoV-2 and PMMoV from the point of entry into the sewer system by using infected  
172 stool spiked into wastewater and studying persistence and degradation of the viral material under the two common  
173 sewer transport conditions of dynamic suspended transport and bed and near-bed transport. This approach leverages  
174 the advantages of spike-in studies for evaluating decay from time zero while benefiting from the use of endogenous  
175 infected material while also simulating realistic environments within wastewaters through the replication of common  
176 transport conditions. This method hence more accurately mirrors the natural conditions the virus encounters upon  
177 entering the sewer system. We hypothesize that the decay dynamics of pathogens within sewer systems are  
178 significantly influenced by both the flow conditions and the hydraulic retention time, the latter being intrinsically linked  
179 to urban planning and population density, which consequently impact the outcomes of WBS across different  
180 municipalities. These factors are critical for interpreting viral signal variations across regions and can facilitate a more  
181 global understanding of pathogen prevalence and movement. By studying the decay rates from the initial stages and

182 within more accurate sewer environments, our research aims to develop a more precise and comprehensive  
183 understanding of viral persistence and decay dynamics in wastewater systems, thus contributing to the enhancement  
184 of wastewater-based epidemiological models.

## 185 **2. Materials and Methods**

### 186 **2.1. Stool and wastewater samples**

187 SARS-CoV-2 positive stool samples containing endogenous SARS-CoV-2 viral material were spiked into  
188 wastewater containing endogenous SARS-CoV-2 to perform the decay experiments, thus simulating the contribution  
189 from source (flushed toilet) into wastewater. To determine the decay rate starting at the time of entry in the sewershed,  
190 5 anonymous stool samples were obtained from consenting SARS-CoV-2 infected adult patients, combined into a  
191 paste, and used to spike the wastewater. The only information obtained from the contributing patients was a confirmed  
192 positive COVID-19 test result, with no other personal medical records obtained. Hence the collection of stool samples  
193 for this study was exempt from research ethics board review. Stool samples were transported on ice and stored at 4°C  
194 in the laboratory. Upon arrival, five biological replicates of stools were immediately extracted and screened for SARS-  
195 CoV-2 and PMMoV using RT-qPCR, as described below, to quantify the level of endogenous viral signals in the spiking  
196 material.

197 An 18.9 L grab sample of post-grit influent wastewater was collected for this study from the City of Ottawa's  
198 Robert O. Pickard Environmental Center, the city's only wastewater treatment plant, which receives and treats the  
199 wastewater of approximately 91% of the residents in Ottawa (Supplemental Table S1). The collected wastewater  
200 sample was transported to the laboratory on ice and preserved at 4°C until the start of the decay experiments and was  
201 not pasteurized or otherwise altered in any way. Upon arrival, five biological replicates of the wastewater were  
202 immediately extracted and screened for SARS-CoV-2 and PMMoV using RT-qPCR, as described below, to quantify  
203 the level of endogenous viral signals. Decay experiments began within 12 hours of the collection of the wastewater. A  
204 grab sample was selected to prioritize the freshness of the sample over representativeness, as the study did not require  
205 monitoring of diurnal variations, and using a composite sample would have introduced an additional 24 hours of  
206 potential decay before analysis.

### 207 **2.2. Temperature-controlled experimental chambers**

208 To conduct decay experiments at various, constant temperatures, three small refrigerators were temperature-  
209 controlled to specific experimental temperatures using an external Inkbird ITC-308 Digital Temperature Controller to



210 act as temperature-controlled experimental chambers. The three small refrigerators were maintained at the  
211 temperatures of  $19.6^{\circ}\text{C} \pm 1.0^{\circ}\text{C}$ ,  $12.5^{\circ}\text{C} \pm 1.1^{\circ}\text{C}$  and  $4.9^{\circ}\text{C} \pm 0.6^{\circ}\text{C}$ , throughout all decay experiments, respectively.

212 **2.3. SARS-CoV-2, PMMoV and total RNA decay experiments simulating dynamic**  
213 **suspended transport conditions at three distinct temperatures**

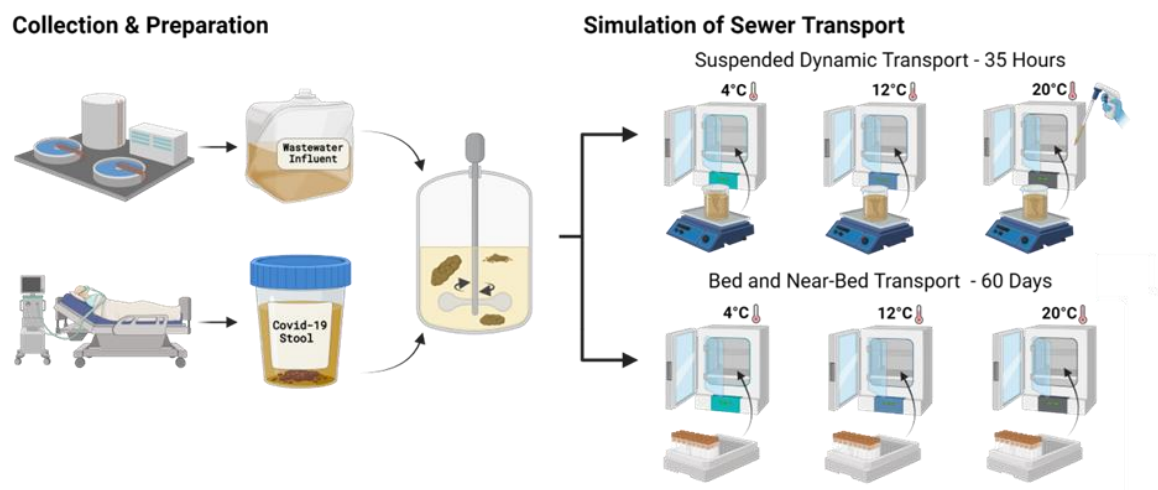

214 **Figure 1:** Experiment set up simulating suspended and bed and near-bed transport conditions in sewersheds

214

215 A series of dynamic suspended transport SARS-CoV-2, PMMoV and total RNA decay experiments were  
216 performed to simulate sewer transport of viral material within small, medium and large subsections of sewersheds.  
217 Hence, short, moderate and long sewer hydraulic retention time times of 0 hours, 2.5 hours, 6.0 hours, 15.0 hours, 24.0  
218 hours, and 35.0 hours were used in this study to reflect the varying distances wastewater travels, based on the distance  
219 from its source, such as households, to the treatment plant. 17.61 grams of stool were dissolved into 2.40 liters of post-  
220 grit wastewater, achieving a concentration of approximately 7.34 g/L, and the mixture was carefully agitated at 4°C until  
221 fully homogenized. The stool-wastewater mix was then separated into three (3) individual reactors containing magnetic  
222 stir bars and placed within temperature-controlled experimental chambers set at target temperature of 4° C, 12° C and  
223 20°C, respectively. The lowest temperature, 4° C, was specifically selected to reflect the conditions in sewers of  
224 northern climate countries during colder periods, while the 12° C and 20°C settings are representative of a wider range  
225 of temperatures commonly encountered in sewer systems across various regions globally (Hart and Halden, 2020;  
226 Vialkova et al., 2020; Wilson and Worrall, 2021). Magnetic stir-plates were installed inside the temperature-controlled  
227 experimental chambers and the 3 individual vessels containing the stool-wastewater mix were placed on top of the stir-  
228 plates, where the magnetic stir plates were used to simulate the well-mixed, dynamic movement and suspension

229 conditions of wastewater-associated solids and fecal material during suspended transport conditions. Five  
230 representatives 40 mL samples of well-homogenized stool-wastewater mixtures were harvested from each reactor  
231 vessel at 0, 2.5, 6.0, 15.0, 24.0, and 35.0 hours. Each time point had five biological replicates, and at the end of the  
232 experiment, half of the initial volume remained in the reactor to ensure representative conditions. SARS-CoV-2 RNA,  
233 PMMoV RNA and total RNA were extracted immediately after sampling. Extracted RNA was never frozen and instead  
234 kept at 4° C until RT-qPCR analysis was performed within 48 hours of extraction, a timeframe during which literature  
235 has confirmed RNA stability (Robinson et al., 2021; Torabi et al., 2023). Control experiments with wastewater samples  
236 that did not contain spiked stool were conducted under identical conditions and are shown in Supplemental Figure S1.  
237 This approach was to verify that the spiked material from infected patients, although endogenously similar to the  
238 material found in typical wastewater samples, behaved comparably to samples collected directly from the treatment  
239 plant only 12 hours earlier.

#### 240 **2.4. SARS-CoV-2, PMMoV and total RNA decay experiments simulating bed and near-** 241 **bed transport conditions at three distinct temperatures**

242 A series of SARS-CoV-2, PMMoV and total RNA decay experiments were designed to simulate bed and near-  
243 bed transport conditions in conventional sewersheds, including sedimentation time representative of wintertime flow  
244 conditions in northern and cold climate countries, where precipitation and groundwater infiltration effects on the  
245 sewershed are significantly reduced. 48 grams of stool were dissolved in 7 liters of post-grit wastewater, achieving a  
246 concentration of approximately 6.86 g/L, and were carefully agitated at 4°C until the stool was fully mixed into the  
247 wastewater. This slightly lower stool concentration was due to logistical constraints in measuring and dissolving the  
248 stool such as residues adhering to the plastic weighing boats. The stool-wastewater mix was then transferred to forty-  
249 five (45) individual 50 mL conical centrifuge tubes. Three individual temperature-controlled experimental chambers  
250 were set to 4° C, 12° C and 20 °C, respectively, and were used to house the 50 mL conical centrifuge tubes, which  
251 were not agitated, simulating quiescent sewershed conditions and sedentary bed and near-bed transport of  
252 wastewater-associated solids and fecal material. Five individual 50 mL conical centrifuge tubes containing stool-  
253 wastewater mixtures were harvested at periodic intervals between 0 and 60 days from each temperature-controlled  
254 experimental chamber. Extended sampling for simulating bed and near-bed transport conditions was necessary due to  
255 these conditions persisting for months. Indeed, sediment layers can remain for months in the sewer system until eroded  
256 by environmental factors (Lange and Wichern, 2013). In colder climates like Ottawa, precipitation solidifies as snow  
257 and ice, reducing flow and erosion until warmer months, when snowmelt and rainfall initiate erosion. Samples were  
258 extracted immediately after sampling, extracted RNA was never frozen and instead maintained at 4° C until, with RT-

259 qPCR analysis being performed within 48 hours of collection of the sample. Control experiments with wastewater  
260 samples that did not contain spiked stool were conducted under identical conditions and are shown in Supplemental  
261 Figure S2. This approach was to verify that the spiked material from infected patients, although endogenously similar  
262 to the material found in typical wastewater samples, behaved comparably to samples collected directly from the  
263 treatment plant only 12 hours earlier.

## 264 **2.5. Sample concentration and nucleic acid extraction**

265 Representative 40 mL samples of well-homogenized stool-wastewater mixtures were collected from the  
266 suspended and bed and near-bed transport temperature-controlled experimental chambers and were immediately  
267 processed. Samples were concentrated and SARS-CoV-2, PMMoV, and total RNA were extracted as described by  
268 D'Aoust et al. (2021b). Briefly, samples were centrifuged at 12,000 x g for 45 minutes, and the supernatant was  
269 discarded. Samples were then centrifuged once again at 12,000 x g for an additional 5 minutes, and the resulting  
270 supernatant was again discarded. RNA was extracted from the resulting pellet using Qiagen's RNeasy  
271 PowerMicrobiome Kit (Qiagen, Germantown, MD), with the following modifications to the manufacturer's procedures:  
272 i) 250 mg of the resulting solids pellet was extracted instead of a 200  $\mu$ L liquid sample, and ii) the optional phenol-  
273 chloroform solution was substituted by Trizol LS reagent (ThermoFisher, ON, Canada). Samples were then eluted in  
274 100  $\mu$ L of RNase/DNase-free water.

## 275 **2.6. RT-qPCR SARS-CoV-2 and PMMoV analyses**

276 The SARS-CoV-2 viral signal was quantified using a singleplex one-step, RT-qPCR targeting the N1 and N2  
277 genomic regions. The PMMoV viral signal was also measured using a singleplex one-step with RT-qPCR targeting a  
278 region in the replication-associated protein portion of the genome (Haramoto et al., 2013). Each PCR reaction was  
279 composed of 1.5  $\mu$ L of RNA template, forward and reverse primers (final concentration of 500 nM each), probe (final  
280 concentration of 250 nM) 2.5  $\mu$ L of 4x TaqMan<sup>®</sup> Fast Virus 1-step Mastermix (ThermoFisher, ON, Canada), in a total  
281 reaction volume of 10  $\mu$ L. All primer sequences used in this study are shown in Supplemental Table S2. All samples  
282 were run in technical triplicates with non-template controls and 5-point standard curves prepared with the Exact  
283 Diagnostic (EDX) COV019 SARS-CoV-2 RNA standard (Exact Diagnostics, TX, USA). PCR cycling conditions were  
284 identical as those described previously (D'Aoust et al., 2021b). The assay's limit of detection (ALOD) and quantification  
285 (ALOQ) for SARS-CoV-2's N1 region were of approximately 2 copies/reaction and 3.2 copies for reaction, respectively.  
286 For the N2 region, they were of approximately 2 copies/reaction and 8.1 copies/reaction, respectively. All cycling  
287 conditions used in this study are shown in Supplemental Table S3.

## 288 **2.7. Total RNA analysis**

289 The total RNA concentration of each sample was measured using an Agilent 2100 Bioanalyzer. 2 µL of  
290 extracted RNA elution was loaded on an RNA 6000 Pico Chip. Further data analysis and concentration determinations  
291 were performed using Agilent's 2100 Expert software (v. B.02.10.SI764).

## 292 **2.8. Sanger sequencing of amplicons**

293 Sanger sequencing was conducted on time point day 21, day 45 and day 60, to ensure that the analyses did  
294 not produce false positives. The specificity of the amplicons resulting from RT-qPCR analyses generated for the various  
295 targets of this study was evaluated via Sanger sequencing. First, a touchdown PCR (TD-PCR) was performed using  
296 Q5<sup>®</sup> High-Fidelity DNA Polymerase with 1 µL of RT-qPCR amplicons as the starting template. The initial touchdown  
297 was performed as follows: [98 °C (30 seconds) + 64 °C → 55 °C, drop of 1 °C/cycle, + 72 °C (30 seconds)] x 10 cycles.  
298 Amplification was then performed as follows: [98 °C (30 seconds) + 64 °C → 55 °C, drop of 0.4 °C/cycle, + 72 °C (30  
299 seconds)] x 25 cycles. The TD-PCR products were then run on a 3% agarose gel at 100V to separate the amplicons.  
300 The amplicon band observed at the appropriate location was then cut and gel extracted using Monarch<sup>®</sup> DNA Gel  
301 Extraction Kit (New England Biolabs, MA, USA) as per the manufacturer's instructions. After obtaining purified DNA, a  
302 novel primer extension strategy for one-step PCR amplification was performed using the Q5<sup>®</sup> High-Fidelity DNA  
303 Polymerase. In brief, 1 ng of DNA was used to extend the N1 and N2 amplicon using the oligo adapters (Supplemental  
304 Table S2) with partial complementarity to the targeted amplicons. An extension PCR amplification was then performed  
305 as follows: 98 °C (30 seconds) + [98 °C (10 seconds) + 50 °C (30 seconds) + 72 °C (30 seconds) x 30 cycles, + 72 °C  
306 (2 minutes). The extension-PCR amplified product is then purified using QIAquick<sup>®</sup> PCR Purification Kit (Qiagen, MD,  
307 USA) following the manufacturer's instructions. The final amplicon product was then sequenced by Sanger Sequencing  
308 at the Ottawa Hospital's Research Institute (OHRI) StemCore Sequencing Facility using an ABI Prism 3730 DNA  
309 Sequencer (Applied Biosystems, MA, USA). The sequences were compiled and edited using BioEdit (ver. 7.2)(Hall,  
310 1999) and sequence alignment was done by Clustal Omega (Madeira et al., 2022). Each PCR reaction had a total  
311 volume of 25 µL and was composed of the amplicons' regular reverse primers (500 nM), A target-specific amplicon-  
312 seq-Stuffer forward primer (50 nM), Stuffer-1 forward primer (50 nM), Stuffer-2 forward primer (500 nM), dNTP (200  
313 µM), and 1X of the 5X Q5 reaction buffer and Q5 high fidelity DNA polymerase (0.02U/µL). All primer sequences used  
314 in this study are shown in Supplemental Table S2.

## 315 **2.9. Volume, PMMoV and total RNA normalization**

316 Measurements of SARS-CoV-2 in this study were normalized using volume, PMMoV, and total RNA to  
317 investigate potential degradation mitigation techniques. Volume normalization was employed instead of flow  
318 normalization to accurately reflect the conditions of this controlled experiment, where sampling was conducted from a  
319 batch reactor rather than a continuous flow system. As such, volume normalization serves as an extrapolation of flow  
320 normalization typically used in wastewater treatment plants with variable daily flow rates. Additionally, since SARS-  
321 CoV-2 and PMMoV are known to be prevalent in the solids fraction (D'Aoust et al., 2021a), volume normalization in  
322 this study effectively simulates the real-world scenario where, despite consistent sampling volumes, the amount of  
323 solids and consequently, the viral signal can vary, even when flow normalization is applied.

## 324 **2.10. Statistical analyses**

### 325 **First order decay rate**

326 The first order decay rate model was applied to the SARS-CoV-2, PMMoV and total RNA targets under  
327 dynamic suspended transport conditions and bed and near-bed transports at temperatures of 4° C, 12° C and 20 °C.  
328 The first order decay rate constant (k) was calculated as shown in equation 1 (Chick, 1908). Here, the term  $[A]_t$   
329 represents the concentration of the target at time t, while  $[A]_0$  is the initial concentration at time zero. The rate was  
330 obtained by calculating the slope of the natural logarithm (Ln) of the concentration of the target's (A) signal versus time  
331 (t). The slope was calculated using GraphPad Prism (version 9.3.1).

$$\ln[A]_t = -kt + \ln[A]_0 \quad (\text{Eq 1})$$

### 332 **Significance of first order decay rate constant**

333 To assess whether the SARS-CoV-2, PMMoV and total RNA targets exhibited decay, a two-tailed t-test with  
334 a significance level ( $\alpha$ ) of 0.05, was used to determine the significance of the first order decay constant under dynamic  
335 suspended transport conditions and bed and near-bed transport conditions at temperatures of 4° C, 12° C, and 20 °C,  
336 with the null hypothesis that the decay rate is zero. These tests were performed on k values obtained from the first  
337 order decay model for all targets at each temperature to determine if each k was significantly different from zero.

### 338 **Comparison of first order decay rate constant**

339 Differences in decay rate constants between targets at various temperatures were assessed using a two-tailed  
340 t-test with a significance level ( $\alpha$ ) of 0.05, with the null hypothesis that the decay rates of the targets were not significantly  
341 different. Specifically, three separate t-tests were conducted for each comparison, always comparing two groups at a  
342 time: SARS-CoV-2 vs. PMMoV, SARS-CoV-2 vs. total RNA, and PMMoV vs. total RNA. Additionally, three independent  
343 t-tests were performed to compare the normalized signals (volume-normalized vs. PMMoV-normalized, volume-  
344 normalized vs. total RNA-normalized, and PMMoV-normalized vs. total RNA-normalized) at temperatures of 4°C, 12°C,  
345 and 20°C. Finally, three independent t-tests were conducted to compare decay rates between different temperature  
346 conditions (4°C vs. 12°C, 4°C vs. 20°C, and 12°C vs. 20°C). All t-tests were performed using GraphPad Prism (version  
347 9.3.1).

### 348 **First order decay rate time needed to achieve 90% reduction ( $T_{90}$ )**

349  $T_{90}$ , the time required for 90% of the starting target to decay, was calculated for the first order decay model as  
350 shown in equation 2. All  $T_{90}$  values were utilized as a comparative measure for analyzing the SARS-CoV-2, PMMoV  
351 and total RNA decay rates at temperatures of 4° C, 12° C and 20 °C and for comparisons with other studies.

$$T_{90} = -\frac{\ln(0.1)}{k} \quad \text{(Eq 2)}$$

352

### 353 **Model fit**

354 To assess model fit, the coefficient of determination ( $R^2$ ) was calculated for both the first order and two-phase  
355 models for all targets and temperatures of the study using GraphPad Prism (version 9.3.1). The  $R^2$  was used to  
356 calculate the proportion of the variation in the dependent variable predictable from the variation in the independent  
357 variable (Gage, 1988).

358

### 359 **Two-phase decay rate**

360 The two-phase decay rate model was applied to the bed and near-bed transport condition data sets to achieve  
361 better model fit compared to the first phase decay model. The two-phase decay constants ( $k_{\text{fast}}$  and  $k_{\text{slow}}$ ) were  
362 calculated using a two-phase decay model as defined in equations 3 to 3.2 using GraphPad Prism (version 9.3.1). This  
363 composite exponential decay model defines the overall decay rate as the sum of a simultaneous fast and a slow  
364 exponential decay as shown in equation 3. The “Percent Fast” parameter defines the proportion of the initial  
365 concentration  $[A]_0$  subjected to the fast decay process, characterized by the rate constant  $k_{\text{fast}}$ . Simultaneously, the  
366 remaining fraction (100 - Percent Fast), undergoes decays at a slower rate  $k_{\text{slow}}$ . The equations 3.1 and 3.2 define the

367 initial concentrations for the fast and slow decay phases, respectively, which are then incorporated into the two-phase  
368 decay model. GraphPad Prism offers the option to include a non-zero plateau, representing the terminal concentration  
369 at which the decay stabilizes. Based on the nature of our study and the expectation that the concentration diminishes  
370 entirely over time, we set the plateau to zero.

$$[A]_t = [A]_{0\ fast} * e^{-k_{fast}*t} + [A]_{0\ slow} * e^{-k_{slow}*t} \quad (\text{Eq 3})$$

$$[A]_{0\ fast} = [A]_0 * \text{Percent Fast} * 0.1 \quad (\text{Eq 3.1})$$

$$[A]_{0\ slow} = [A]_0 * (100 - \text{Percent Fast}) * 0.1 \quad (\text{Eq 3.2})$$

371

### 372 **Two-phase decay rate time needed to achieve 90% reduction ( $T_{90}$ )**

373  $T_{90}$ , the time required for 90% of the starting target to decay, was calculated for the two-phase decay model  
374 as shown in equation 4.  $T_{90}$  was calculated for two-phase decay model by solving equation 4 for  $t$  using a bisection  
375 numerical method. This calculation was performed using the “uniroot” function from the “rootSolve” library in R  
376 programming language. All  $T_{90}$  values were utilized as a comparative measure for analyzing the decay rates of SARS-  
377 CoV-2, PMMoV and total RNA decay rates at temperatures of 4° C, 12° C and 20 °C.

$$0.1 = (\text{Percent Fast} * 0.01) * e^{-k_{fast}*t} + ((100 - \text{Percent Fast}) * 0.01) * e^{-k_{slow}*t} \quad (\text{Eq 4})$$

378

## 379 **3. Results and Discussion**

### 380 **3.1. Decay of SARS-CoV-2, PMMoV and total RNA under conditions simulating toilet** 381 **flushed stool and dynamic sewer suspended transport**

382 The dynamic suspended transport experiments, conducted over a 35-hour period, were designed to mimic the  
383 rapid transit conditions typically experienced in sewer systems under normal flow conditions, simulating the movement  
384 of viral material from the time of a toilet flush using spiked-in infected stool material. Measurements of SARS-CoV-2,  
385 PMMoV and total RNA (Figure 2A to 2C), as well as the volume-normalized, PMMoV-normalized and total RNA-  
386 normalized SARS-CoV-2 signal (Figure 2D to 2F), are presented over a simulated sewer transport time of 35 hours.  
387 The volume-normalized results are calculated by volume normalizing the study data with the reactor volumes, which is  
388 analogous to flow-normalized data collected from a full-scale, continuous flow operating system. No significant decay  
389 was observed in the SARS-CoV-2, PMMoV and total RNA measurements within 35-hour period. Consequently, there  
390 were also no changes observed in the volume-normalized, PMMoV-normalized and total RNA-normalized SARS-CoV-



391 2 signals. These observations, particularly for SARS-CoV-2 and PMMoV, are consistent with previous studies. While  
 392 the previous studies did not directly replicate dynamic flow conditions, they assessed decay at temperatures between  
 393 4°C and 20°C using spiked-in viral materials and endogenous viral material already present in wastewater. Sala-  
 394 Comorera et al. (2021) employed spiked-in viral material in river water and seawater at 4°C and 20°C, observing no  
 395 decay in river water at either temperature and no decay in seawater at 4°C, with significant decay occurring only in  
 396 seawater at 20°C. Similarly, Roldan-Hernandez et al. (2022) used endogenous material from wastewater that had  
 397 already been in the sewer system for 17 hours and observed little decay during the first 24 hours at temperatures  
 398 ranging from 4°C to 22°C. Interestingly, there are also contracting findings in the current literature, with studies by

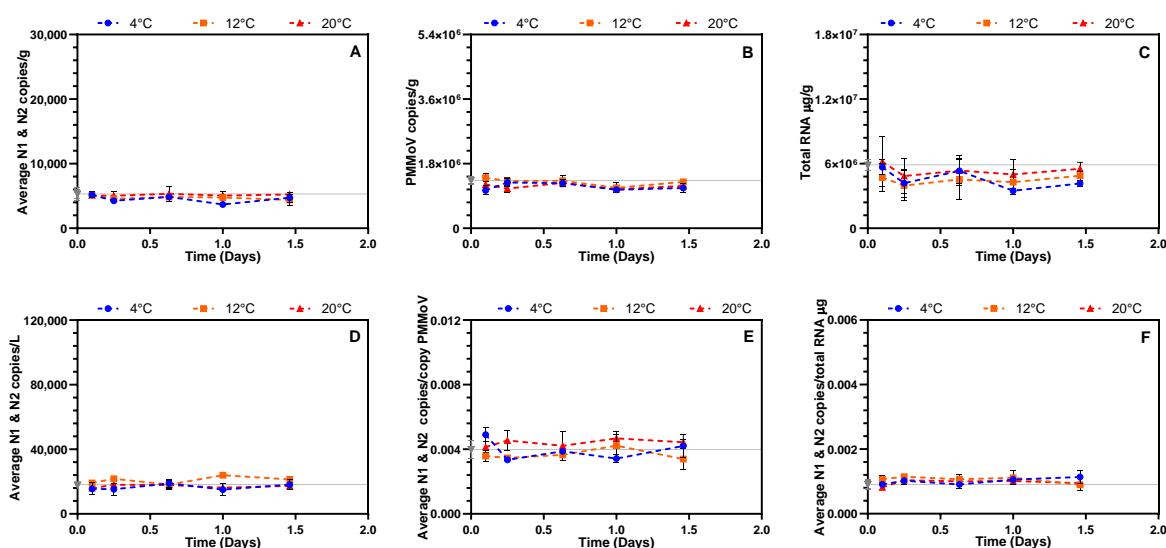

**Figure 2:** Observed measurements across 35 hours under conditions simulating conventional sewer flow conditions of **A** SARS-CoV-2; **B** PMMoV; **C** total RNA signal. Observed measurements of SARS-CoV-2 across 35 hours under conventional sewer flow setting normalized by **D** volume; **E** PMMoV; **F** total RNA. Starting signal levels are represented by the gray line. Mean and standard deviation are displayed for three temperatures, 4°C, 12°C and 20°C. Where the standard deviation is too small, the error bars are not displayed. Each measurement was performed using 6 technical triplicates from three biological replicates (n=5).

399 Weidhaas et al. (2021) reporting significant decay of endogenous material during studies on sample storage at 4, 10  
 400 and 35 C, hence indicating that there may exist other factors influencing decay. As such, this study shows that  
 401 endogenous SARS-CoV-2 viral material, PMMoV viral material and total RNA released from stool do not significantly  
 402 decay under suspended sewer transport conditions during conventional sewer travel times from the point of entry in  
 403 sewersheds to the sampling point at temperatures between 4°C and 20°C.

404 To confirm that no statistically significant differences existed between the viral signal trends over the 35-hour  
 405 simulated transport period, we conducted a series of independent student's t-tests. For each targets (3) and  
 406 normalization methods (3), we assessed the effect of temperature using three separate tests: 4°C vs. 12°C, 4°C vs.  
 407 20°C, and 12°C vs. 20°C, resulting in a total of 18 tests. Additionally, we performed t-tests to compare the different



408 normalization methods (volume-normalized vs. PMMoV-normalized, volume-normalized vs. total RNA-normalized, and  
409 PMMoV-normalized vs. total RNA-normalized). The resulting p-values were all above the significance threshold ( $\alpha =$   
410 0.05), indicating that neither temperature nor normalization method had a significant effect on persistence or  
411 degradation, which was expected given the nonsignificant decay trends observed across all measured targets. These  
412 findings are consistent with those reported by a recent endogenous PMMoV and SARS-CoV-2 decay study by  
413 Roldan-Hernandez et al. (2022) that found limited decay when subjected to temperature of 4°C and 22°C for a 10-day  
414 period. In contrast, several other studies that use spiked virus with testing conditions that more closely simulate bed  
415 and near-bed transport that report an increasing decay rate constant with increasing temperature, especially with  
416 temperatures above 25°C (Ahmed et al., 2020b; de Oliveira et al., 2021; Roldan-Hernandez et al., 2022; Weidhaas et  
417 al., 2021; Yang et al., 2022). Our study hence addresses gaps in current knowledge and contradictory findings in the  
418 literature by demonstrating that SARS-CoV-2, PMMoV and total RNA do not significantly decay under suspended sewer  
419 transport conditions after the flush event at temperatures between 4°C and 20°C.

### 420 **3.2. Decay of SARS-CoV-2, PMMoV and total RNA under conditions simulating toilet** 421 **flushed stool and bed and near-bed sewer transport**

422 The bed and near-bed transport experiments extended up to 60 days to represent the longer retention times  
423 of sedimented solids associated with lower flow conditions in the sewer system, particularly during colder months when  
424 flow rates decrease. As with the dynamic transport experiments, spiked-in infected stool material was used to simulate  
425 the transport of viral material from the time of a toilet flush. The concentrations of SARS-CoV-2, PMMoV and total RNA,  
426 Figure 3A to 3, as well as the volume-normalized, PMMoV-normalized and total RNA-normalized SARS-CoV-2 viral  
427 signal, Figures 3D to 3F, throughout the 60-day experimental period is shown below. Sanger sequencing was  
428 conducted at time points on day 21, day 45, and day 60 to ensure that the analyses did not produce false positives,  
429 with all tests exhibiting a homology greater than 95% to the SARS-CoV-2 reference sequence (Severe acute respiratory  
430 syndrome coronavirus 2 genome assembly, chromosome: 1, GenBank: OV387455.1) A statistically significant,  
431 unexpected, increase in the measurements of SARS-CoV-2 ( $121\% \pm 21\%$ ; Figure 3A), PMMoV ( $75\% \pm 14\%$ ; Figure  
432 3B) and total RNA ( $248\% \pm 6\%$ ; Figure 3C) at all temperatures are observed at the very beginning of the experiment  
433 (between day 0 and day 1 as shown between the grey colour data point at time zero and the subsequent data points  
434 shown in blue ( $T=4^\circ\text{C}$ ), orange ( $T=12^\circ\text{C}$ ) and red ( $T=20^\circ\text{C}$ )). Specifically, increases in SARS-CoV-2 ( $15\% \pm 4\%$ ),  
435 PMMoV ( $63\% \pm 10\%$ ) and total RNA ( $160\% \pm 12\%$ ) were recorded across all temperatures. Similarly, an increase at  
436 all temperatures for the volume-normalized dataset ( $25\% \pm 10\%$ ) were also observed while no significant changes were  
437 noted for the PMMoV or RNA normalized signals. This increase was also seen in the non-stool-spiked wastewater

438 control, ruling out the possibility this increase was caused solely by the use of spiked-in stool material in this study  
439 (Supplementary Figure S2). As further exploration of this increase was beyond the scope of this study, we herein limit  
440 the discussion of this phenomenon to a few brief statements that this change may be caused by the stool and  
441 wastewater being exposed to the specific simulated bed and near-bed transport conditions in this study, as this same  
442 increase was not observed when the stool or the wastewater was exposed to the dynamic suspended transport  
443 conditions (i.e. were well mixed throughout the experimental phase). As such, it is possible that the microenvironments  
444 within the wastewater mixed with stool created by non-mixed conditions of the vessels throughout the experimental  
445 phase may have become anaerobic or anoxic and hence have increased the accessibility to the measurement targets  
446 within the wastewater matrix. Indeed, as shown in Figure 4A, a drop of  $1.52 \pm 0.27$  in pH is observed between time 0  
447 and day 1 under bed and near-bed transport conditions while Figure 4B shows that pH remains relatively constant after  
448 1 day of exposure to suspended transport conditions. The measured decrease in pH under simulated bed and near-  
449 bed transport conditions supports the potential of anaerobic conditions and a related shift in microenvironments within  
450 the wastewater matrix which could in turn lead to a decrease in pH and a change in the partitioning of the target material  
451 that may result in an increase of the accessibility of targets during the concentration and extraction analytical processes  
452 used in this study (Espinosa et al., 2022). Further work is needed to continue to investigate this unique behaviour of an  
453 increase in target material during exposure to unmixed transport conditions.

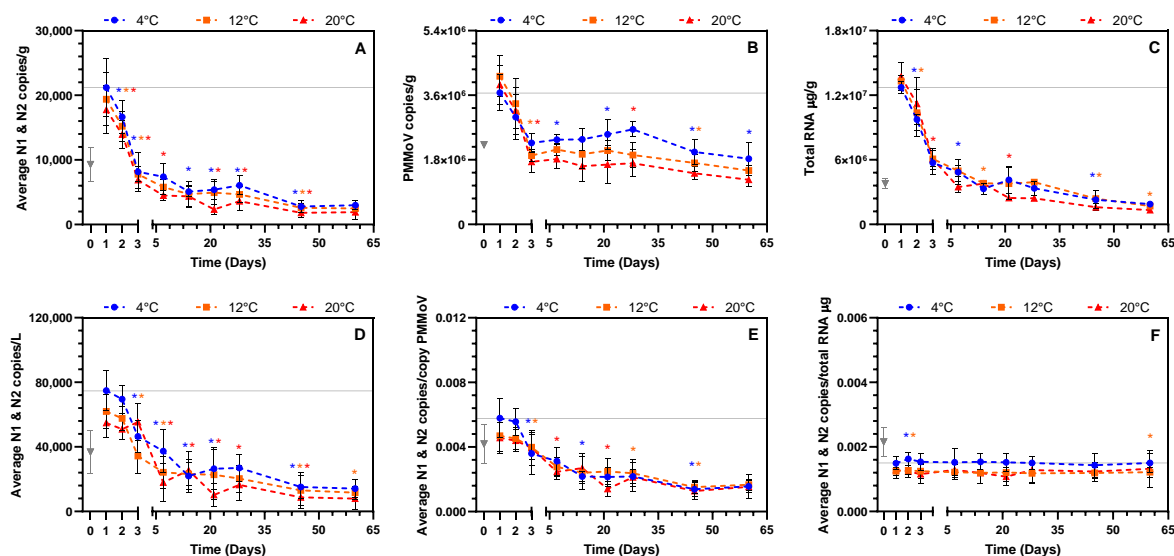

**Figure 3:** Observed measurements across 60 days under conditions simulating bed and near-bed transport conditions of **A** SARS-CoV-2; **B** PMMoV; **C** total RNA signal. Observed measurements of SARS-CoV-2 across 60 days under conditions simulating bed and near-bed transport conditions normalized by: **D** volume; **E** PMMoV; **F** total RNA. Mean and standard deviations are displayed for three temperatures, 4°C, 12°C and 20°C. Where the standard deviation is too small, the error bars are not displayed. Each measurement is performed in 6 technical triplicates from five biological replicates (n=5). Asterisks indicate which data points are statistically different from the previous one based on p-value cut-off of minimum <0.05.

454 Decay rates were investigated from day 1 to day 60 of the simulated bed and near-bed transport conditions,  
455 following the exclusion of the initial 24-hour increase in signal, which was beyond the scope of this study (Figure 3).  
456 Statistically significant decay was observed in SARS-CoV-2 and total RNA signal at all temperatures at day 2 while  
457 PMMoV measurements only began showing signs of statistically significant decay at day 3. The heightened stability of  
458 PMMoV may be attributed to its robust rod-shaped structure (Kitajima et al., 2014), while SARS-CoV-2 is hypothesized  
459 to be present in wastewater primarily as fragmented virions (Kantor et al., 2021). For volume-normalized and PMMoV-  
460 normalized signals, statistically significant change was observed on day 3 at 4°C and 12°C, but not 20°C. Total RNA-  
461 normalized signal shows no significant changes except on day 2 at 4°C, 12°C and 20°C, due to the unexpected increase  
462 described before, and again only on day 60 at 12°C. SARS-CoV-2, PMMoV and total RNA signals as well as volume-  
463 normalized signals demonstrated a rapid decay in measured signal between day 1 to 3, followed by a marked tapering  
464 of the decay for the remainder of the study (days 7 to 60). During this experiment, PMMoV-normalized viral signal  
465 showed a constant decrease between days 1 to 45, while total RNA-normalized viral signal showed almost no change  
466 from days 1 to 60. A first order decay model was first investigated to model the experimental data. The mean first order  
467 decay rate constants at temperature of 4°C to 20°C for SARS-CoV-2, PMMoV and total RNA ranged from of 0.045 to  
468 0.053 day<sup>-1</sup>, 0.014 to 0.025 day<sup>-1</sup> and 0.040 to 0.050 day<sup>-1</sup> respectively. The subsequent calculated decay rates at  
469 temperature of 4°C to 20°C for the volume-normalized and PMMoV-normalized signal ranged from, 0.037 to 0.042 day<sup>-1</sup>  
470 and 0.032 to 0.027 day<sup>-1</sup> respectively. The mean first order decay rate of total RNA-normalized signal was non-  
471 calculatable because there as no decay present of this normalized signal.

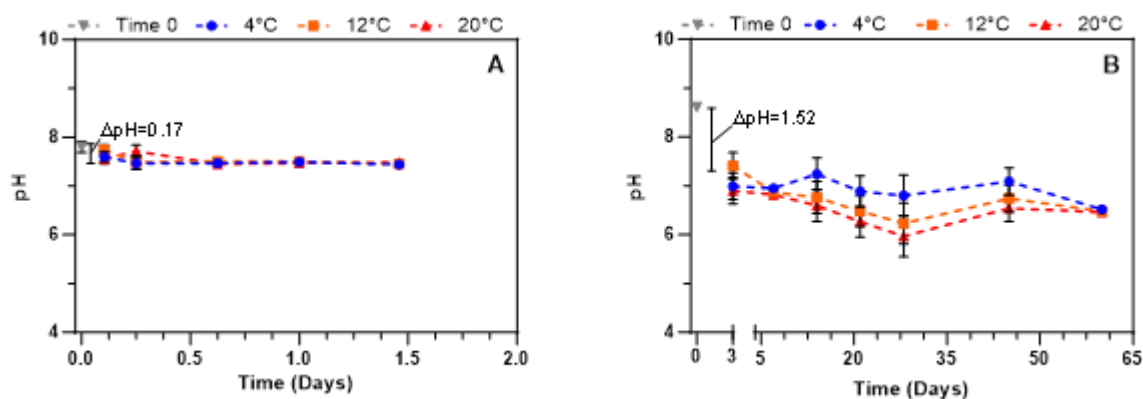

**Figure 4:** pH variation across time in: **A** conditions simulating dynamic suspended transport; **B** conditions simulating bed and near-bed transport conditions.

472  
473 The  $T_{90}$  values ranged from 43.4 to 51.2 days for SARS-CoV-2, 92.1 to 164.5 days for PMMoV and 46.1 to  
474 57.6 days for total RNA (Table 3). At all temperatures, the SARS-CoV-2  $T_{90}$  observed in this study is larger than the

475 values reported by studies investigating decay rates of lab propagated spiked SARS-CoV-2 material in wastewater (1.6  
 476 – 36 days) (Ahmed et al., 2020b; de Oliveira et al., 2021; Hokajärvi et al., 2021). However the reported range  
 477 significantly broadens (0.5 – 154.9 days) when considering studies investigated decay with endogenous SARS-CoV-2  
 478 (Babler et al., 2023; Hart et al., 2023; Roldan-Hernandez et al., 2022; Weidhaas et al., 2021; Yang et al., 2022), with  
 479 this range now including the  $T_{90}$  values measured in this study. The  $T_{90}$  values of this study in combination with the  
 480 findings of previously reported value suggest that endogenous SARS-CoV-2 is more persistent and hence more  
 481 resistant to decay than lab propagated spiked material. The PMMoV  $T_{90}$  observed in this study falls within the range of  
 482 reported values from other studies investigating endogenous PMMoV material (25.3 – 237.4 days) (Rachmadi, 2016;  
 483 Roldan-Hernandez et al., 2022; Sala-Comorera et al., 2021). The variability in the reported  $T_{90}$  values in current  
 484 literature suggests that there are additional, unreported factors influencing decay rates. Our study highlights the  
 485 knowledge gap of the influence of decay from the point of entry into the sewer system and also the influence of various  
 486 sewer flow conditions on endogenous signal decay. This further emphasizes the need for more research to identify  
 487 other potential sources of variation, such as wastewater matrix composition, target titer and sewer infrastructure.

488  
 489 **Table 3:** Mean and 95% confidence interval of first order decay constant ( $k$ ) and  $T_{90}$  under conditions simulating toilet  
 490 flushed stool and bed and near-bed sewer transport.

| Measurement                                      | Temperature (°C) | First Order Decay Model             |                                    |       |
|--------------------------------------------------|------------------|-------------------------------------|------------------------------------|-------|
|                                                  |                  | $k$ ( $d^{-1}$ )<br>(Mean) [95% CI] | $T_{90}$ (days)<br>(Mean) [95% CI] | $R^2$ |
| Average N1 & N2<br>(copies/g)                    | 4                | 0.045 [0.048 to 0.042]              | 51.2 [48.0 to 54.8]                | 0.48  |
|                                                  | 12               | 0.049 [0.052 to 0.046]              | 47.0 [44.3 to 50.1]                | 0.54  |
|                                                  | 20               | 0.053 [0.056 to 0.049]              | 43.4 [41.1 to 47.0]                | 0.63  |
| PMMoV<br>(copies/g)                              | 4                | 0.014 [0.016 to 0.012]              | 164.5 [143.9 to 191.9]             | 0.32  |
|                                                  | 12               | 0.022 [0.025 to 0.019]              | 104.7 [92.1 to 121.2]              | 0.40  |
|                                                  | 20               | 0.025 [0.028 to 0.022]              | 92.1 [82.2 to 104.7]               | 0.38  |
| total RNA<br>( $\mu$ g/g)                        | 4                | 0.040 [0.047 to 0.034]              | 57.6 [49.0 to 67.7]                | 0.63  |
|                                                  | 12               | 0.041 [0.047 to 0.035]              | 56.2 [49.0 to 65.8]                | 0.67  |
|                                                  | 20               | 0.050 [0.058 to 0.043]              | 46.1 [39.7 to 53.5]                | 0.77  |
| Average N1 & N2<br>(copies/L)                    | 4                | 0.037 [0.040 to 0.035]              | 62.2 [57.6 to 67.7]                | 0.53  |
|                                                  | 12               | 0.037 [0.040 to 0.033]              | 62.2 [57.6 to 69.8]                | 0.42  |
|                                                  | 20               | 0.042 [0.046 to 0.038]              | 54.8 [50.1 to 60.6]                | 0.59  |
| Average N1 & N2<br>(copies/copies<br>PMMoV)      | 4                | 0.032 [0.034 to 0.030]              | 72.0 [67.7 to 76.8]                | 0.54  |
|                                                  | 12               | 0.025 [0.027 to 0.023]              | 62.2 [57.6 to 69.8]                | 0.50  |
|                                                  | 20               | 0.027 [0.029 to 0.025]              | 85.3 [79.4 to 92.1]                | 0.51  |
| Average N1 & N2<br>(copies/total<br>RNA $\mu$ g) | 4                | n.c.                                | n.c.                               | n.c.  |
|                                                  | 12               | n.c.                                | n.c.                               | n.c.  |
|                                                  | 20               | n.c.                                | n.c.                               | n.c.  |

491 n.c. indicate non-calculatable, where the model was unstable because no decay was present.

492 The three normalization strategies applied in this research, volume-normalized, PMMoV-normalized and total  
493 RNA-normalized SARS-CoV-2, demonstrate that the total RNA normalization strategy effectively corrects for time  
494 decay of SARS-CoV-2 under bed and near-bed transport conditions, when decay of the viral measurement is  
495 significant. An evaluation of whether decay constants were significantly non-zero showed in this study that only the  
496 total RNA normalization yielded nonsignificant first order decay constants, with p-values of 0.9588, 0.0511, and 0.1640  
497 at 4°C, 12°C, and 20°C, respectively (Supplemental Table S4). This is to be expected as the decay rate of SARS-CoV-  
498 2 was distinct from the decay rate of PMMoV ( $p < 0.001$  at all temperatures) while, when compared with total RNA, no  
499 significant difference was seen between the decay rate of SARS-CoV-2 and total RNA (p-value of 0.2166, 0.0738 and  
500 0.6824 at 4°C, 12°C and 20°C respectively) (Supplementary Table S5). This suggests that the measurement of SARS-  
501 CoV-2 decays at a similar rate to the measurement of the total RNA of stool and wastewaters. Hence, total RNA is  
502 identified in this study as an important normalizing marker for sewer decay during bed and near-bed transport conditions  
503 and hence also as a potential important indicator of sewer flushing events that are known to re-suspend settled solids  
504 from within sewer infrastructure.

### 505 **3.2.1. Temperature effect**

506 To investigate the effect of temperature on decay rate constants, comparisons were made between the rates  
507 at different temperatures: 4°C versus 12°C, 4°C versus 20°C, and 12°C versus 20°C. These comparisons were  
508 conducted for measurements of SARS-CoV-2, PMMoV, total RNA, and their normalized values (Supplemental Table  
509 S6). A significant temperature effect was observed between the decay rate of SARS-CoV-2 at 4°C and 20°C (p-  
510 value=0.0021). The decay rate of PMMoV differed significantly between 4°C and 12°C and between 4°C and 20°C with  
511 both showing p-values of less than 0.0001. A significant difference was only observed for the decay rate of total RNA  
512 between 4°C and 20°C, with a p-value of 0.0433, which is close to the conventional threshold for significance. This  
513 suggests that additional data would be required to more accurately interpret the influence of temperature on total RNA  
514 decay. The volume-normalized signal datasets also indicated significant temperature effects, with significant  
515 differences observed between 4°C and 20°C (p-value=0.0330), as well as between 12°C and 20°C (p-value=0.0387).  
516 Similarly, PMMoV-normalized measurements showed significant differences between 4°C and 12°C, and 4°C and 20°C  
517 (p-values < 0.0001 and 0.0016, respectively), which could be partially driven by the temperature effect on the normalizer,  
518 PMMoV itself. Finally, no temperature effect was observed on the total RNA-normalized signal, as there was no decay  
519 detected, which aligns with the finding that total RNA would be a suitable normalizer for sewer decay under bed and  
520 near-bed transport conditions and as an identifier of sewer flushing events that re-suspends settled solids. Despite the  
521 statistical significance observed in temperature-related differences in decay rates, the actual magnitude of these

522 changes is minimal. When we assess the impact of temperature on the decay constant by linearizing the relationship  
523 through a  $\text{Log}_{10}$  transformation of the mean first order decay rate against temperature, as shown in Figure 5, only  
524 PMMoV demonstrates a discernible trend of increasing decay constant with rising temperature. In contrast, SARS-  
525 CoV-2, total RNA and volume-normalized  $\text{Log}_{10}$  linearize decay versus temperature display a flat trend, and the  
526 PMMoV-normalized data even shows a slight inverse correlation. This deviates from what is typically reported in the  
527 literature for spiked viruses (Ahmed et al., 2020b) where temperature impact is significant. However, this could be  
528 attributed to the enhanced persistence of RNA when bound with dissolved organic matter in wastewater (Roldan-  
529 Hernandez et al., 2022), which may impede its biodegradation in natural systems, potentially offering protection against  
530 temperature effects (Chatterjee et al., 2023). This suggests that the persistent measurement of endogenous SARS-  
531 CoV-2, PMMoV, and total RNA is primarily driven by transport conditions and travel time within the sewer system,  
532 rather than by temperature. This conclusion is reinforced by the alignment of this study's decay rates with findings from  
533 modelling of endogenous signals, which suggests that time spent in the sewer system has a greater impact on  
534 degradation than temperature (Guo et al., 2023; McCall et al., 2022).

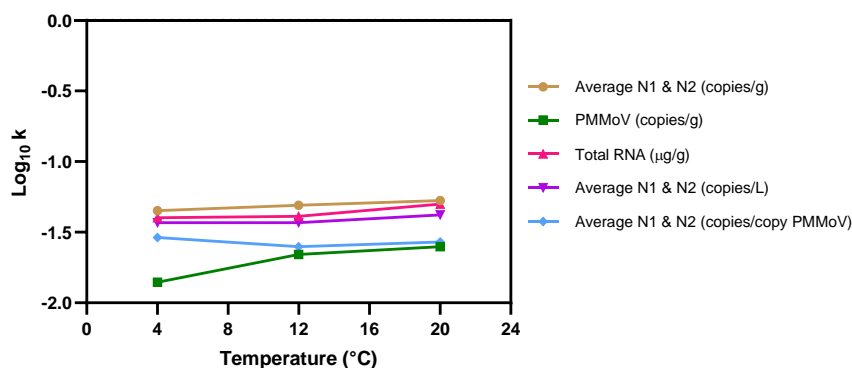

Figure 5:  $\text{Log}_{10}$  linearization of the mean first order decay rate constant against temperature

### 535 3.2.1. Two-phase decay

536 In addition to applying a first order decay model to the experimental data (excluding the initial 24-hour period),  
537 a two-phase decay model was also evaluated to describe the decay dynamics observed from day 1 to day 60. The fit  
538 of the model was assessed using an extra sum-of-squares F test. For SARS-CoV-2, PMMoV, total RNA signals and  
539 the normalized signals, results showed that the F test values exceeded the critical threshold, indicating that the two-  
540 phases decay model had a better fit compared to the first order model. This finding implies that decay time might be  
541 underestimated by the first order model, with the decrease in measurements being more accurately expressed in the  
542 two-phases decay model. The p-values for each test were less than 0.0001, suggesting that the F-statistic results are  
543 not likely due to random variability. The total RNA-normalized signal had a p-value of 0.0018, which is significantly  
544 higher than other results and because no decay was observable in the RNA-normalized data.

545 **Table 4:** Mean and 95% confidence interval of two-phase decay constant ( $k$ ) and  $T_{90}$  under conditions simulating  
546 toilet flushed stool and bed and near-bed sewer transport.

| Measurement                                 | Temperature (°C) | Two-Phase Decay Model                       |                          |                              |                     | R2   |
|---------------------------------------------|------------------|---------------------------------------------|--------------------------|------------------------------|---------------------|------|
|                                             |                  | $k$ (day <sup>-1</sup> )<br>(Mean) [95% CI] | $T_{90}$ (days) [95% CI] | Fast phase<br>Percentage (%) |                     |      |
| Average N1 & N2<br>(copies/g)               | 4                | $k_{fast}$ :                                | 0.842 [0.712 to 1.000]   | 340.7 [464.6 to 255.6]       | 81.7 [78.8 to 84.2] | 0.79 |
|                                             |                  | $k_{slow}$ :                                | 0.015 [0.011 to 0.020]   |                              |                     |      |
|                                             | 12               | $k_{fast}$ :                                | 0.700 [0.603 to 0.812]   | 363 [564.6 to 267.4]         | 82.4 [79.9 to 84.7] | 0.84 |
|                                             |                  | $k_{slow}$ :                                | 0.014 [0.009 to 0.019]   |                              |                     |      |
|                                             | 20               | $k_{fast}$ :                                | 0.660 [0.576 to 0.756]   | 307.2 [491.6 to 223.4]       | 85.7 [83.3 to 87.8] | 0.86 |
|                                             |                  | $k_{slow}$ :                                | 0.016 [0.010 to 0.022]   |                              |                     |      |
| PMMoV (copies/g)                            | 4                | $k_{fast}$ :                                | 1.343 [0.751 to 3.594]   | 1388.8 [2777.5 to 793.6]     | 63.2 [47.2 to 90.7] | 0.54 |
|                                             |                  | $k_{slow}$ :                                | 0.004 [0.002 to 0.007]   |                              |                     |      |
|                                             | 12               | $k_{fast}$ :                                | 0.875 [0.634 to 1.213]   | 1088.2 [2720.6 to 680.1]     | 70.6 [63.6 to 76.7] | 0.76 |
|                                             |                  | $k_{slow}$ :                                | 0.005 [0.002 to 0.008]   |                              |                     |      |
|                                             | 20               | $k_{fast}$ :                                | 0.789 [0.556 to 1.108]   | 1079.9 [2699.7 to 599.9]     | 72.6 [65.6 to 78.4] | 0.74 |
|                                             |                  | $k_{slow}$ :                                | 0.005 [0.002 to 0.009]   |                              |                     |      |
| total RNA<br>(µg/g)                         | 4                | $k_{fast}$ :                                | 0.934 [0.707 to 1.269]   | 327.6 [476.5 to 238.3]       | 78.3 [73.6 to 82.4] | 0.92 |
|                                             |                  | $k_{slow}$ :                                | 0.016 [0.011 to 0.022]   |                              |                     |      |
|                                             | 12               | $k_{fast}$ :                                | 0.922 [0.536 to 1.831]   | 299.8 [539.6 to 199.9]       | 72.7 [62.1 to 84.1] | 0.89 |
|                                             |                  | $k_{slow}$ :                                | 0.018 [0.010 to 0.027]   |                              |                     |      |
|                                             | 20               | $k_{fast}$ :                                | 0.539 [0.389 to 0.746]   | 282.8 [1272.8 to 149.7]      | 82.2 [74.6 to 88.1] | 0.63 |
|                                             |                  | $k_{slow}$ :                                | 0.018 [0.004 to 0.034]   |                              |                     |      |
| Average N1 & N2<br>(copies/L)               | 4                | $k_{fast}$ :                                | 0.449 [0.317 to 0.626]   | 394.2 [613.2 to 275.9]       | 66.1 [59.6 to 71.4] | 0.68 |
|                                             |                  | $k_{slow}$ :                                | 0.014 [0.009 to 0.020]   |                              |                     |      |
|                                             | 12               | $k_{fast}$ :                                | 0.590 [0.445 to 0.775]   | 416.3 [676.5 to 284.8]       | 71.9 [65.7 to 77.0] | 0.61 |
|                                             |                  | $k_{slow}$ :                                | 0.013 [0.008 to 0.019]   |                              |                     |      |
|                                             | 20               | $k_{fast}$ :                                | 0.260 [0.189 to 0.350]   | 357.4 [1340.2 to 206.2]      | 74.2 [64.8 to 82.2] | 0.68 |
|                                             |                  | $k_{slow}$ :                                | 0.015 [0.004 to 0.026]   |                              |                     |      |
| Average N1 & N2<br>(copies/copies<br>PMMoV) | 4                | $k_{fast}$ :                                | 0.475 [0.325 to 0.667]   | 427.7 [695 to 308.9]         | 62.7 [56.5 to 67.9] | 0.69 |
|                                             |                  | $k_{slow}$ :                                | 0.013 [0.008 to 0.018]   |                              |                     |      |
|                                             | 12               | $k_{fast}$ :                                | 0.319 [0.217 to 0.463]   | 562.7 [937.8 to 401.9]       | 50.1 [42.2 to 56.8] | 0.61 |
|                                             |                  | $k_{slow}$ :                                | 0.010 [0.006 to 0.014]   |                              |                     |      |
|                                             | 20               | $k_{fast}$ :                                | 0.220 [0.138 to 0.334]   | 697.9 [5582.9 to 398.8]      | 60.4 [51.3 to 69.3] | 0.63 |
|                                             |                  | $k_{slow}$ :                                | 0.008 [0.001 to 0.014]   |                              |                     |      |
| Average N1 & N2<br>(copies/total RNA<br>µg) | 4                | $k_{fast}$ :                                | n.c.                     | n.c.                         | n.c.                | n.c. |
|                                             |                  | $k_{slow}$ :                                | n.c.                     |                              |                     |      |
|                                             | 12               | $k_{fast}$ :                                | n.c.                     | n.c.                         | n.c.                | n.c. |
|                                             |                  | $k_{slow}$ :                                | n.c.                     |                              |                     |      |
|                                             | 20               | $k_{fast}$ :                                | n.c.                     | n.c.                         | n.c.                | n.c. |
|                                             |                  | $k_{slow}$ :                                | n.c.                     |                              |                     |      |

547 *n.c. indicate non-calculatable, where the model was unstable because no decay was present.*

548 The mean second order decay rates at temperatures ranging from 4°C to 20°C for SARS-CoV-2, PMMoV,  
549 and total RNA ranged respectively from 0.660 to 0.842 day<sup>-1</sup>, 0.798 to 1.343 day<sup>-1</sup>, and 0.539 to 0.934 day<sup>-1</sup> for  $k_{fast}$ .



550 For  $k_{\text{slow}}$ , these rates were 0.014 to 0.015 day<sup>-1</sup>, 0.004 to 0.005 day<sup>-1</sup>, and 0.016 to 0.018 day<sup>-1</sup> (Table 4). The calculated  
551 decay rates at the same temperature range for the volume-normalized and PMMoV-normalized signals ranged  
552 respectively from 0.260 to 0.590 day<sup>-1</sup> and 0.220 to 0.475 day<sup>-1</sup> for  $k_{\text{fast}}$ . For  $k_{\text{slow}}$ , these rates were 0.013 to 0.015 day<sup>-1</sup>  
553 and 0.008 to 0.013 day<sup>-1</sup> (Table 4). The model was unstable and could not fit the RNA-normalized signals as no decay  
554 was present. The  $T_{90}$  values ranged from 307.2 to 340.7 days for SARS-CoV-2, 1079.9 to 1388.8 days for PMMoV,  
555 and 282.8 to 372.6 days for total RNA (Table 4). These values fall outside the range observed in studies using  
556 endogenous SARS-CoV-2 (0.5 – 154.9 days) and PMMoV (25.3 – 237.4 days) which could be due to an  
557 underestimation of the reported decay rate when modelled with a first order decay model (Roldan-Hernandez et al.,  
558 2022; Weidhaas et al., 2021; Yang et al., 2022). This discrepancy may also stem from our study's approach to  
559 measuring persistence and degradation, including the examination of decay from the point of entry into the system, a  
560 factor often overlooked in other studies and potentially leading to an underestimation of  $T_{90}$  values, and also our  
561 approach to simulate common transport conditions within sewer systems. Hence, the use of spiked-in stool samples  
562 and assessing the impact of common flow conditions on endogenous SARS-CoV-2 and PMMoV decay could contribute  
563 to these observed differences, bridging key knowledge gaps in achieving a more accurate representation of the decay  
564 dynamics of these target materials in real-world sewer systems. Once again, the  $k_{\text{fast}}$  and  $k_{\text{slow}}$  of SARS-CoV-2 and  
565 PMMoV were statistically different, with PMMoV decaying much slower than the SARS-CoV-2 target. On the other  
566 hand, the  $k_{\text{fast}}$  and  $k_{\text{slow}}$  of total RNA was similar to that of SARS-CoV-2. As a result, both flow and PMMoV were shown  
567 not to be adequate normalizers of targets exposed to bed and near-bed transport conditions. These findings suggest  
568 that while PMMoV is a good fecal marker normalizer, its slower decay rate makes it unsuitable for normalizing decay  
569 occurring in bed and near-bed transport. In addition the study shows that total RNA-normalized signal is an appropriate  
570 biomarker to normalize for bed and near-bed transport and in turn is a potential important indicator of sewer flushing  
571 events.

## 572 **4. Conclusions**

573 Our study offers insights into the endogenous decay of SARS-CoV-2, PMMoV and total RNA from point of  
574 entry in the sewer system, the toilet flush event, and during two predominant sewer transport conditions. Simulated  
575 dynamic suspended transport over 35 hours period revealed good persistence and minimal degradation of the  
576 measurement of SARS-CoV-2, PMMoV, and total RNA throughout short, moderate and long sewer transport conditions  
577 that simulate small, medium and large sewersheds subsections. The observed decay rates showed no significant decay  
578 rate for SARS-CoV-2, PMMoV or total RNA which appears to be independent of temperature effects within the  
579 temperature range of 4°C to 20°C. This finding indicates negligible decay in dynamic suspended transport.



580 In contrast, the experiments simulating bed and near-bed transport conditions for 60 days demonstrated an  
581 initial unexpected increase in the measurement of SARS-CoV-2, PMMoV, and total RNA. This could be attributed to  
582 microenvironment shifts caused by the simulated transport conditions, a phenomenon that warrants further  
583 investigation. Due to the complexity of this initial phase, the data from day 0 to 1 were excluded from the decay analysis.  
584 Subsequently, decay was computed from day 1 to 60, where significant decay rates were observed with differing decay  
585 patterns for SARS-CoV-2, PMMoV, and total RNA being observed. Temperature effect was minimal, suggesting the  
586 decay is primarily driven by transport conditions and travel time within the sewer system, rather than by temperature.  
587 The decay rates of the simulated bed and near-bed transport were observed to be within the range of previous studies  
588 on endogenous targets. Although within the range, the variability in reported decay patterns suggests the potential  
589 influence of other parameters like wastewater matrix composition, viral titers, or sewer system dynamics, which need  
590 further exploration. To that end, our research particularly highlighted the previously overlooked impacts on endogenous  
591 signals of decay from point of entry into the system and the role of different flow conditions in this process. While our  
592 first order decay model fell short in predicting the decay rates, a two-phases decay model significantly improved the fit  
593 during bed and near-bed transport. Total RNA normalization emerged as the most effective strategy for correcting time  
594 decay in sewer systems experiencing bed and near-bed transport conditions. The outcomes of our study have  
595 implications for understanding and modelling of SARS-CoV-2 WBS in sewersheds, especially systems that undergo  
596 bed and near-bed transport conditions followed by sudden resuspension and mixing events, such as large rainfall  
597 events, where flushing of the sewer infrastructure causes the re-suspension of SARS-CoV-2, PMMoV and total RNA  
598 gene targets. This study also underlines the need for further investigation into time zero, toilet flush decay studies  
599 performed under different sewer transport conditions.

## 600 **5. Declaration of competing interests**

601 The authors declare that no known competing financial interests or personal relationships could appear to  
602 influence the work reported in this manuscript.

## 603 **6. Acknowledgements**

604 The authors wish to acknowledge the help and assistance of the University of Ottawa, the Ottawa Hospital,  
605 the Children's Hospital of Eastern Ontario, the Children's Hospital of Eastern Ontario's Research Institute, Public Health  
606 Ontario and all their employees involved in the project. Most specifically, the authors wish to thank Jessica Haines,  
607 Rebecca Porteous, Irene Watpool. Their time, facilities, resources, and feedback are greatly appreciated.

## 608 **7. Funding**

609 This research was supported by the Province of Ontario's Wastewater Surveillance Initiative (WSI). This  
610 research was also supported by a CHEO (Children's Hospital of Eastern Ontario) CHAMO (Children's Hospital  
611 Academic Medical Organization) grant, awarded to Dr. Alex E. MacKenzie. This research was supported by the CIHR  
612 Applied Public Health Research Chair in Environment, Climate Change and One Health, awarded to Dr. Robert  
613 Delatolla. The funding source had no involvement in the study design, data collection, data analysis, data interpretation,  
614 nor the writing or decision to submit the paper for publication.

615

## 616 **8. References**

617 Ahmed, W., Angel, N., Edson, J., Bibby, K., Bivins, A., O'Brien, J.W., Choi, P.M., Kitajima, M., Simpson, S.L., Li, J.,  
618 Tscharke, B., Verhagen, R., Smith, W.J.M., Zaugg, J., Dierens, L., Hugenholtz, P., Thomas, K. V., Mueller, J.F.,  
619 2020a. First confirmed detection of SARS-CoV-2 in untreated wastewater in Australia: A proof of concept for the  
620 wastewater surveillance of COVID-19 in the community. *Science of the Total Environment* 728.  
621 <https://doi.org/10.1016/j.scitotenv.2020.138764>

622 Ahmed, W., Bertsch, P.M., Bibby, K., Haramoto, E., Hewitt, J., Huygens, F., Gyawali, P., Korajkic, A., Riddell, S.,  
623 Sherchan, S.P., Simpson, S.L., Sirikanchana, K., Symonds, E.M., Verhagen, R., Vasan, S.S., Kitajima, M., Bivins,  
624 A., 2020b. Decay of SARS-CoV-2 and surrogate murine hepatitis virus RNA in untreated wastewater to inform  
625 application in wastewater-based epidemiology. *Environ Res* 191, 110092.  
626 <https://doi.org/10.1016/j.envres.2020.110092>

627 Ahmed, W., Bivins, A., Bertsch, P.M., Bibby, K., Choi, P.M., Farkas, K., Gyawali, P., Hamilton, K.A., Haramoto, E.,  
628 Kitajima, M., Simpson, S.L., Tandukar, S., Thomas, K. V., Mueller, J.F., 2020c. Surveillance of SARS-CoV-2  
629 RNA in wastewater: Methods optimization and quality control are crucial for generating reliable public health  
630 information. *Curr Opin Environ Sci Health* 17, 82–93. <https://doi.org/10.1016/J.COESH.2020.09.003>

631 Ashley, R.M., Crabtree, R.W., 1992. Sediment Origins, Deposition and Build-Up in Combined Sewer Systems. *Water*  
632 *Science and Technology* 25, 1–12. <https://doi.org/10.2166/WST.1992.0173>

- 633 Babler, K.M., Sharkey, M.E., Abelson, S., Amirali, A., Benitez, A., Cosculluela, G.A., Grills, G.S., Kumar, N., Laine, J.,  
634 Lamar, W., Lamm, E.D., Lyu, J., Mason, C.E., McCabe, P.M., Raghavender, J., Reding, B.D., Roca, M.A.,  
635 Schürer, S.C., Stevenson, M., Szeto, A., Tallon, J.J., Vidović, D., Zarnegarnia, Y., Solo-Gabriele, H.M., 2023.  
636 Degradation rates influence the ability of composite samples to represent 24-hourly means of SARS-CoV-2 and  
637 other microbiological target measures in wastewater. *Sci Total Environ* 867.  
638 <https://doi.org/10.1016/J.SCITOTENV.2023.161423>
- 639 Bertrand-Krajewski, J.L., Briat, P., Scrivener, O., 2010. Sewer sediment production and transport modelling: A literature  
640 review. <http://dx.doi.org/10.1080/00221689309498869> 31, 435–460.  
641 <https://doi.org/10.1080/00221689309498869>
- 642 Bivins, A., Greaves, J., Fischer, R., Yinda, K.C., Ahmed, W., Kitajima, M., Munster, V.J., Bibby, K., 2020. Persistence  
643 of SARS-CoV-2 in Water and Wastewater. *Environ Sci Technol Lett.* <https://doi.org/10.1021/acs.estlett.0c00730>
- 644 Brouwer, A.F., Eisenberg, J.N.S., Pomeroy, C.D., Shulman, L.M., Hindiyeh, M., Manor, Y., Grotto, I., Koopman, J.S.,  
645 Eisenberg, M.C., 2018. Epidemiology of the silent polio outbreak in Rahat, Israel, based on modeling of  
646 environmental surveillance data. *Proc Natl Acad Sci U S A* 115, E10625–E10633.  
647 [https://doi.org/10.1073/PNAS.1808798115/SUPPL\\_FILE/PNAS.1808798115.SD04.CSV](https://doi.org/10.1073/PNAS.1808798115/SUPPL_FILE/PNAS.1808798115.SD04.CSV)
- 648 Chatterjee, A., Zhang, K., Parker, K.M., 2023. Binding of Dissolved Organic Matter to RNA and Protection from  
649 Nuclease-Mediated Degradation. *Environ Sci Technol* 57, 16086–16096.  
650 [https://doi.org/10.1021/ACS.EST.3C05019/ASSET/IMAGES/LARGE/ES3C05019\\_0004.JPEG](https://doi.org/10.1021/ACS.EST.3C05019/ASSET/IMAGES/LARGE/ES3C05019_0004.JPEG)
- 651 Chick, H., 1908. An investigation of the laws of disinfection. *Journal of Hygiene* 8, 92–158.  
652 <https://doi.org/10.1017/S0022172400006987>
- 653 CRABTREE, R.W., 1989. Sediments in Sewers. *Water and Environment Journal* 3, 569–578.  
654 <https://doi.org/10.1111/J.1747-6593.1989.TB01437.X>
- 655 D'Aoust, P.M., Mercier, É., Montpetit, D., Jia, J., Alexandrov, I., Neault, N., Baig, A.T., Mayne, J., Zhang, X., Alain, T.,  
656 Langlois, M.-A., Servos, M.R., MacKenzie, M., Figeys, D., MacKenzie, A.E., Graber, T.E., Delatolla, R., 2021a.  
657 Quantitative analysis of SARS-CoV-2 RNA from wastewater solids in communities with low COVID-19 incidence  
658 and prevalence. *Water Res* 188, 116560. <https://doi.org/10.1016/j.watres.2020.116560>

- 659 D'Aoust, P.M., Tian, X., Towhid, S.T., Xiao, A., Mercier, E., Hegazy, N., Jia, J.J., Wan, S., Kabir, M.P., Fang, W.,  
660 Fuzzen, M., Hasing, M., Yang, M.I., Sun, J., Plaza-Diaz, J., Zhang, Z., Cowan, A., Eid, W., Stephenson, S.,  
661 Servos, M.R., Wade, M.J., MacKenzie, A.E., Peng, H., Edwards, E.A., Pang, X.L., Alm, E.J., Graber, T.E.,  
662 Delatolla, R., 2022. Wastewater to clinical case (WC) ratio of COVID-19 identifies insufficient clinical testing,  
663 onset of new variants of concern and population immunity in urban communities. *Science of The Total*  
664 *Environment* 853, 158547. <https://doi.org/10.1016/J.SCITOTENV.2022.158547>
- 665 D'Aoust, P.M., Towhid, S.T., Mercier, É., Hegazy, N., Tian, X., Bhatnagar, K., Zhang, Z., Naughton, C.C., MacKenzie,  
666 A.E., Graber, T.E., Delatolla, R., 2021b. COVID-19 wastewater surveillance in rural communities: Comparison of  
667 lagoon and pumping station samples. *Science of The Total Environment* 801, 149618.  
668 <https://doi.org/10.1016/j.scitotenv.2021.149618>
- 669 de Oliveira, L.C., Torres-Franco, A.F., Lopes, B.C., Santos, B.S.Á. da S., Costa, E.A., Costa, M.S., Reis, M.T.P., Melo,  
670 M.C., Polizzi, R.B., Teixeira, M.M., Mota, C.R., 2021. Viability of SARS-CoV-2 in river water and wastewater at  
671 different temperatures and solids content. *Water Res* 195, 117002. <https://doi.org/10.1016/j.watres.2021.117002>
- 672 Diamond, M.B., Keshaviah, A., Bento, A.I., Conroy-Ben, O., Driver, E.M., Ensor, K.B., Halden, R.U., Hopkins, L.P.,  
673 Kuhn, K.G., Moe, C.L., Rouchka, E.C., Smith, T., Stevenson, B.S., Susswein, Z., Vogel, J.R., Wolfe, M.K.,  
674 Stadler, L.B., Scarpino, S. V., 2022. Wastewater surveillance of pathogens can inform public health responses.  
675 *Nature Medicine* 2022 28:10 28, 1992–1995. <https://doi.org/10.1038/s41591-022-01940-x>
- 676 Espinosa, M.F., Verbyla, M.E., Vassalle, L., Leal, C., Leroy-Freitas, D., Machado, E., Fernandes, L., Rosa-Machado,  
677 A.T., Calábria, J., Chernicharo, C., Mota Filho, C.R., 2022. Reduction and liquid-solid partitioning of SARS-CoV-  
678 2 and adenovirus throughout the different stages of a pilot-scale wastewater treatment plant. *Water Res* 212,  
679 118069. <https://doi.org/10.1016/J.WATRES.2022.118069>
- 680 Feng, S., Roguet, A., McClary-Gutierrez, J.S., Newton, R.J., Kloczko, N., Meiman, J.G., McLellan, S.L., 2021.  
681 Evaluation of Sampling, Analysis, and Normalization Methods for SARS-CoV-2 Concentrations in Wastewater to  
682 Assess COVID-19 Burdens in Wisconsin Communities. *ACS ES&T Water* 1, 1955–1965.  
683 <https://doi.org/10.1021/acsestwater.1c00160>
- 684 Gage, T.B., 1988. Mathematical hazard models of mortality: An alternative to model life tables. *Am J Phys Anthropol*  
685 76, 429–441. <https://doi.org/10.1002/AJPA.1330760403>

- 686 Guajardo-Leiva, S., Chnaiderman, J., Gaggero, A., Díe, B., 2020. Metagenomic Insights into the Sewage RNA  
687 Virosphere of a Large City. *Viruses* 2020, Vol. 12, Page 1050 12, 1050. <https://doi.org/10.3390/V12091050>
- 688 Guo, Y., Liu, Y., Gao, S., Zhou, X., Sivakumar, M., Jiang, G., 2023. Effects of Temperature and Water Types on the  
689 Decay of Coronavirus: A Review. *Water (Switzerland)* 15, 1051. <https://doi.org/10.3390/W15061051/S1>
- 690 Hall, T., 1999. BioEdit: a user-friendly biological sequence alignment editor and analysis program for Windows  
691 95/98/NT, in: *Nucleic Acids Symp. Ser.* pp. 95–98.
- 692 Haramoto, E., Kitajima, M., Kishida, N., Konno, Y., Katayama, H., Asami, M., Akiba, M., 2013. Occurrence of pepper  
693 mild mottle virus in drinking water sources in Japan. *Appl Environ Microbiol* 79, 7413–7418.  
694 <https://doi.org/10.1128/AEM.02354-13>
- 695 Hart, J.J., Jamison, M.N., McNair, J.N., Szlag, D.C., 2023. Frequency and degradation of SARS-CoV-2 markers N1,  
696 N2, and E in sewage. *J Water Health* 21, 514–524. <https://doi.org/10.2166/WH.2023.314>
- 697 Hart, O.E., Halden, R.U., 2020. Modeling wastewater temperature and attenuation of sewage-borne biomarkers  
698 globally. *Water Res* 172, 115473. <https://doi.org/10.1016/J.WATRES.2020.115473>
- 699 Hegazy, N., Cowan, A., D'Aoust, P.M., Mercier, É., Towhid, S.T., Jia, J.J., Wan, S., Zhang, Z., Kabir, M.P., Fang, W.,  
700 Graber, T.E., MacKenzie, A.E., Guilherme, S., Delatolla, R., 2022. Understanding the dynamic relation between  
701 wastewater SARS-CoV-2 signal and clinical metrics throughout the pandemic. *Science of The Total Environment*  
702 853, 158458. <https://doi.org/10.1016/J.SCITOTENV.2022.158458>
- 703 Hokajärvi, A.M., Rytönen, A., Tiwari, A., Kauppinen, A., Oikarinen, S., Lehto, K.M., Kankaanpää, A., Gunnar, T., Al-  
704 Hello, H., Blomqvist, S., Miettinen, I.T., Savolainen-Kopra, C., Pitkänen, T., 2021. The detection and stability of  
705 the SARS-CoV-2 RNA biomarkers in wastewater influent in Helsinki, Finland. *Science of the Total Environment*  
706 770, 145274. <https://doi.org/10.1016/j.scitotenv.2021.145274>
- 707 Huang, C., Wang, Y., Li, X., Ren, L., Zhao, J., Hu, Y., Zhang, L., Fan, G., Xu, J., Gu, X., Cheng, Z., Yu, T., Xia, J., Wei,  
708 Y., Wu, W., Xie, X., Yin, W., Li, H., Liu, M., Xiao, Y., Gao, H., Guo, L., Xie, J., Wang, G., Jiang, R., Gao, Z., Jin,  
709 Q., Wang, J., Cao, B., 2020. Clinical features of patients infected with 2019 novel coronavirus in Wuhan, China.  
710 *The Lancet* 395, 497–506. [https://doi.org/10.1016/S0140-6736\(20\)30183-5](https://doi.org/10.1016/S0140-6736(20)30183-5)

- 711 Kantor, R.S., Nelson, K.L., Greenwald, H.D., Kennedy, L.C., 2021. Challenges in Measuring the Recovery of SARS-  
712 CoV-2 from Wastewater. *Environ Sci Technol* 55, 3514–3519. <https://doi.org/10.1021/acs.est.0c08210>
- 713 Keshaviah, A., Diamond, Megan B., Wade, M.J., Scarpino, S. V., Ahmed, W., Amman, F., Aruna, O., Badilla-Aguilar,  
714 A., Bar-Or, I., Bergthaler, A., Bines, J.E., Bivins, A.W., Boehm, A.B., Brault, J.M., Burnet, J.B., Chapman, J.R.,  
715 Chaudhuri, A., de Roda Husman, A.M., Delatolla, R., Dennehy, J.J., Diamond, Megan Beth, Donato, C., Duizer,  
716 E., Ekwuenu, A., Erster, O., Fatta-Kassinos, D., Gaggero, A., Gilpin, D.F., Gilpin, B.J., Graber, T.E., Green, C.A.,  
717 Handley, A., Hewitt, J., Holm, R.H., Insam, H., Johnson, M.C., Johnson, R., Jones, D.L., Julian, T.R., Jyothi, A.,  
718 Kohn, T., Kuhn, K.G., La Rosa, G., Lesenfants, M., Manuel, D.G., D'Aoust, P.M., Markt, R., McGrath, J.W.,  
719 Medema, G., Moe, C.L., Murni, I.K., Naser, H., Naughton, C.C., Ogorzaly, L., Oktaria, V., Ort, C., Karaolia, P.,  
720 Patel, E.H., Paterson, S., Rahman, M., Rivera-Navarro, P., Robinson, A., Santa-Maria, M.C., Schmitt, H., Smith,  
721 T., Stadler, L.B., Stassijns, J., Stenico, A., Street, R.A., Suffredini, E., Susswein, Z., Trujillo, M., Wolfe, M.K.,  
722 Yakubu, H., Zanolli Sato, M.I., 2023. Wastewater monitoring can anchor global disease surveillance systems.  
723 *Lancet Glob Health* 11, e976–e981. [https://doi.org/10.1016/S2214-109X\(23\)00170-5](https://doi.org/10.1016/S2214-109X(23)00170-5)
- 724 Kitajima, M., Iker, B.C., Pepper, I.L., Gerba, C.P., 2014. Relative abundance and treatment reduction of viruses during  
725 wastewater treatment processes — Identification of potential viral indicators. *Science of The Total Environment*  
726 488–489, 290–296. <https://doi.org/10.1016/J.SCITOTENV.2014.04.087>
- 727 Kitajima, M., Sassi, H.P., Torrey, J.R., 2018. Pepper mild mottle virus as a water quality indicator. *NPJ Clean Water* 1.  
728 <https://doi.org/10.1038/s41545-018-0019-5>
- 729 Kumar, M., Patel, A.K., Shah, A. V., Raval, J., Rajpara, N., Joshi, M., Joshi, C.G., 2020. First proof of the capability of  
730 wastewater surveillance for COVID-19 in India through detection of genetic material of SARS-CoV-2. *Science of*  
731 *the Total Environment* 746, 141326. <https://doi.org/10.1016/j.scitotenv.2020.141326>
- 732 La Rosa, G., Bonadonna, L., Lucentini, L., Kenmoe, S., Suffredini, E., 2020. Coronavirus in water environments:  
733 Occurrence, persistence and concentration methods - A scoping review. *Water Res.*  
734 <https://doi.org/10.1016/j.watres.2020.115899>
- 735 Lange, R.L., Wichern, M., 2013. Sedimentation dynamics in combined sewer systems. *Water Science and Technology*  
736 68, 756–762. <https://doi.org/10.2166/WST.2013.278>

- 737 Madeira, F., Pearce, M., Tivey, A.R.N., Basutkar, P., Lee, J., Edbali, O., Madhusoodanan, N., Kolesnikov, A., Lopez,  
738 R., 2022. Search and sequence analysis tools services from EMBL-EBI in 2022. *Nucleic Acids Res* 1–4.  
739 <https://doi.org/10.1093/nar/gkac240>
- 740 McCall, C., Fang, Z.N., Li, D., Czubai, A.J., Juan, A., Laturner, Z.W., Ensor, K., Hopkins, L., Bedient, P.B., Stadler,  
741 L.B., 2022. Modeling SARS-CoV-2 RNA degradation in small and large sewersheds. *Environ Sci (Camb)* 8, 290–  
742 300. <https://doi.org/10.1039/D1EW00717C>
- 743 Michael-Kordatou, I., Karaolia, P., Fatta-Kassinos, D., 2020. Sewage analysis as a tool for the COVID-19 pandemic  
744 response and management: the urgent need for optimised protocols for SARS-CoV-2 detection and  
745 quantification. *J Environ Chem Eng* 8, 104306. <https://doi.org/https://doi.org/10.1016/j.jece.2020.104306>
- 746 Naughton, C.C., Roman, F.A., Alvarado, A.G.F., Tariqi, A.Q., Deeming, M.A., Kadonsky, K.F., Bibby, K., Bivins, A.,  
747 Medema, G., Ahmed, W., Katsivelis, P., Allan, V., Sinclair, R., Rose, J.B., 2023. Show us the data: global COVID-  
748 19 wastewater monitoring efforts, equity, and gaps. *FEMS Microbes* 4, 1–8.  
749 <https://doi.org/10.1093/femsmc/xtad003>
- 750 Nieuwenhuijse, D.F., Oude Munnink, B.B., Phan, M.V.T., Hendriksen, R.S., Bego, A., Rees, C., Neilson, E.H., Coventry,  
751 K., Collignon, P., Allerberger, F., Rahube, T.O., Oliveira, G., Ivanov, I., Sopheak, T., Vuthy, Y., Yost, C.K., Tabo,  
752 D. adjim, Cuadros-Orellana, S., Ke, C., Zheng, H., Baisheng, L., Jiao, X., Donado-Godoy, P., Coulibaly, K.J.,  
753 Hrenovic, J., Jergović, M., Karpíšková, R., Elsborg, B., Legesse, M., Eguale, T., Heikinheimo, A., Villacis, J.E.,  
754 Sanneh, B., Malania, L., Nitsche, A., Brinkmann, A., Saba, C.K.S., Kocsis, B., Solymosi, N., Thorsteinsdottir,  
755 T.R., Hatha, A.M., Alebouyeh, M., Morris, D., O'Connor, L., Cormican, M., Moran-Gilad, J., Battisti, A., Alba, P.,  
756 Shakenova, Z., Kiiyukia, C., Ng'eno, E., Raka, L., Bērziņš, A., Avsejenko, J., Bartkevics, V., Penny, C., Rajandas,  
757 H., Parimannan, S., Haber, M.V., Pal, P., Schmitt, H., van Passel, M., van de Schans, M.G.M., Zuidema, T.,  
758 Jeunen, G.J., Gemmell, N., Fashae, K., Wester, A.L., Holmstad, R., Hasan, R., Shakoor, S., Rojas, M.L.Z., Wasyl,  
759 D., Bosevska, G., Kochubovski, M., Radu, C., Gassamaḡ, A., Radosavljevic, V., Tay, M.Y.F., Zuniga-Montanez,  
760 R., Wuertz, S., Gavačová, D., Trkov, M., Keddy, K., Esterhuyse, K., Cerdà-Cuéllar, M., Pathirage, S., Larsson,  
761 D.G.J., Norrgren, L., Örn, S., Van der Heijden, T., Kumburu, H.H., de RodaHusman, A.M., Njanpop-Lafourcade,  
762 B.M., Bidjada, P., Nikiema-Pessinaba, S.C., Levent, B., Meschke, J.S., Beck, N.K., Van Dang, C., Tran, D.M.N.,  
763 Do Phuc, N., Kwenda, G., Munk, P., Venkatakrishnan, S., Aarestrup, F.M., Cotten, M., Koopmans, M.P.G., 2020.  
764 Setting a baseline for global urban virome surveillance in sewage. *Scientific Reports* 2020 10:1 10, 1–13.  
765 <https://doi.org/10.1038/s41598-020-69869-0>

- 766 O'Reilly, K.M., Allen, D.J., Fine, P., Asghar, H., 2020. The challenges of informative wastewater sampling for SARS-  
767 CoV-2 must be met: lessons from polio eradication. *Lancet Microbe* 1, e189–e190.  
768 [https://doi.org/10.1016/S2666-5247\(20\)30100-2](https://doi.org/10.1016/S2666-5247(20)30100-2)
- 769 Park, S., Lee, C.-W., Park, D.-I., Woo, H.-Y., Cheong, H.S., Shin, H.C., Ahn, K., Kwon, M.-J., Joo, E.-J., 2020. Detection  
770 of SARS-CoV-2 in Fecal Samples From Patients With Asymptomatic and Mild COVID-19 in Korea. *Clinical*  
771 *Gastroenterology and Hepatology*. <https://doi.org/10.1016/j.cgh.2020.06.005>
- 772 Parra-Arroyo, L., Martínez-Ruiz, M., Lucero, S., Oyervides-Muñoz, M.A., Wilkinson, M., Melchor-Martínez, E.M.,  
773 Araújo, R.G., Coronado-Apodaca, K.G., Velasco Bedran, H., Buitrón, G., Noyola, A., Barceló, D., Iqbal, H.M.N.,  
774 Sosa-Hernández, J.E., Parra-Saldívar, R., 2023. Degradation of viral RNA in wastewater complex matrix models  
775 and other standards for wastewater-based epidemiology: A review. *TrAC Trends in Analytical Chemistry* 158,  
776 116890. <https://doi.org/10.1016/J.TRAC.2022.116890>
- 777 Peccia, J., Zulli, A., Brackney, D.E., Grubaugh, N.D., Kaplan, E.H., Casanovas-Massana, A., Ko, A.I., Malik, A.A.,  
778 Wang, D., Wang, M., Warren, J.L., Weinberger, D.M., Arnold, W., Omer, S.B., 2020. Measurement of SARS-  
779 CoV-2 RNA in wastewater tracks community infection dynamics. *Nat Biotechnol* 38, 1164–1167.  
780 <https://doi.org/10.1038/s41587-020-0684-z>
- 781 Pecson, B.M., Darby, E., Haas, C.N., Amha, Y.M., Bartolo, M., Danielson, R., Dearborn, Y., Di Giovanni, G., Ferguson,  
782 C., Fevig, S., Gaddis, E., Gray, D., Lukasik, G., Mull, B., Olivas, L., Olivieri, A., Qu, Y., Sars-Cov-2 Interlaboratory  
783 Consortium, 2021. Reproducibility and sensitivity of 36 methods to quantify the SARS-CoV-2 genetic signal in  
784 raw wastewater: findings from an interlaboratory methods evaluation in the U.S. *Environ Sci (Camb)* 7, 504–520.  
785 <https://doi.org/10.1039/D0EW00946F>
- 786 Qteishat, O., Myszograj, S., Suchowska-Kisielewicz, M., 2011. Changes of wastewater characteristic during transport  
787 in sewers Decision Support System for Sustainable and GHG Optimized Milk Production in Key European Areas-  
788 MilKey View project Mitigating Emissions from Livestock Systems-MELS View project Changes of wastewater  
789 characteristic during transport in sewers. Article in *WSEAS Transactions on Environment and Development* 7.
- 790 Rachmadi, A., 2016. Human Enteric Viruses : The Abundance , Detection , Inactivation , and Their Impact for The  
791 Human Health and Environment. Conference paper.



- 792 Randazzo, W., Truchado, P., Cuevas-Ferrando, E., Simón, P., Allende, A., Sánchez, G., 2020. SARS-CoV-2 RNA in  
793 wastewater anticipated COVID-19 occurrence in a low prevalence area. *Water Res* 181.  
794 <https://doi.org/10.1016/j.watres.2020.115942>
- 795 Robinson, C.A., Hsieh, H.-Y., Hsu, S.-Y., Wang, Y., Salcedo, B.T., Belenchia, A., Klutts, J., Zemmer, S., Reynolds, M.,  
796 Semkiw, E., Foley, T., Wan, X., Wieberg, C.G., Wenzel, J., Lin, C.-H., Johnson, Marc C, Johnson, M C, 2021.  
797 Defining biological and biophysical properties of SARS-CoV-2 genetic material in wastewater-NC-ND license  
798 (<http://creativecommons.org/licenses/by-nc-nd/4.0/>). <https://doi.org/10.1016/j.scitotenv.2021.150786>
- 799 Roldan-Hernandez, L., Graham, K.E., Duong, D., Boehm, A.B., 2022. Persistence of Endogenous SARS-CoV-2 and  
800 Pepper Mild Mottle Virus RNA in Wastewater-Settled Solids. *ACS Environmental Science and Technology Water*.  
801 [https://doi.org/10.1021/ACSESTWATER.2C00003/ASSET/IMAGES/LARGE/EW2C00003\\_0002.JPEG](https://doi.org/10.1021/ACSESTWATER.2C00003/ASSET/IMAGES/LARGE/EW2C00003_0002.JPEG)
- 802 Sala-Comorera, L., Reynolds, L.J., Martin, N.A., O'Sullivan, J.J., Meijer, W.G., Fletcher, N.F., 2021. Decay of infectious  
803 SARS-CoV-2 and surrogates in aquatic environments. *Water Res* 201.  
804 <https://doi.org/10.1016/j.watres.2021.117090>
- 805 Thompson, J.R., Nancharaiah, Y. V., Gu, X., Lee, W.L., Rajal, V.B., Haines, M.B., Girones, R., Ng, L.C., Alm, E.J.,  
806 Wuertz, S., 2020. Making waves: Wastewater surveillance of SARS-CoV-2 for population-based health  
807 management. *Water Res* 184. <https://doi.org/10.1016/j.watres.2020.116181>
- 808 Tisza, M., Javornik Cregeen, S., Avadhanula, V., Zhang, P., Ayzav, T., Feliz, K., Hoffman, K.L., Clark, J.R., Terwilliger,  
809 A., Ross, M.C., Cormier, J., Moreno, H., Wang, L., Payne, K., Henke, D., Troisi, C., Wu, F., Rios, J., Deegan, J.,  
810 Hansen, B., Balliew, J., Gitter, A., Zhang, K., Li, R., Bauer, C.X., Mena, K.D., Piedra, P.A., Petrosino, J.F.,  
811 Boerwinkle, E., Maresso, A.W., 2023. Wastewater sequencing reveals community and variant dynamics of the  
812 collective human virome. *Nature Communications* 2023 14:1 14, 1–10. [https://doi.org/10.1038/s41467-023-](https://doi.org/10.1038/s41467-023-42064-1)  
813 [42064-1](https://doi.org/10.1038/s41467-023-42064-1)
- 814 Torabi, S., Amirsoleimani, A., Dehghan Banadaki, M., Strike, W.D., Rockward, A., Noble, A., Liversedge, M., Keck,  
815 J.W., Berry, S.M., 2023. Stabilization of SARS-CoV-2 RNA in wastewater via rapid RNA extraction. *Science of*  
816 *The Total Environment* 878, 162992. <https://doi.org/10.1016/J.SCITOTENV.2023.162992>
- 817 Torii, S., Oishi, W., Zhu, Y., Thakali, O., Malla, B., Yu, Z., Zhao, B., Arakawa, C., Kitajima, M., Hata, A., Ihara, M.,  
818 Kyuwa, S., Sano, D., Haramoto, E., Katayama, H., 2022. Comparison of five polyethylene glycol precipitation

819 procedures for the RT-qPCR based recovery of murine hepatitis virus, bacteriophage phi6, and pepper mild  
820 mottle virus as a surrogate for SARS-CoV-2 from wastewater. *Science of The Total Environment* 807, 150722.  
821 <https://doi.org/10.1016/J.SCITOTENV.2021.150722>

822 Vialkova, E., Maksimova, S., Zemlyanova, M., Maksimov, L., Vorotnikova, A., 2020. Integrated Design Approach to  
823 Small Sewage Systems in the Arctic Climate. *Environmental Processes* 7, 673–690.  
824 <https://doi.org/10.1007/S40710-020-00427-6/FIGURES/12>

825 Weidhaas, J., Aanderud, Z.T., Roper, D.K., VanDerslice, J., Gaddis, E.B., Ostermiller, J., Hoffman, K., Jamal, R., Heck,  
826 P., Zhang, Y., Torgersen, K., Laan, J. Vander, LaCross, N., 2021. Correlation of SARS-CoV-2 RNA in wastewater  
827 with COVID-19 disease burden in sewersheds. *Science of the Total Environment* 775.  
828 <https://doi.org/10.1016/j.scitotenv.2021.145790>

829 Wilson, M.P., Worrall, F., 2021. The heat recovery potential of ‘wastewater’: a national analysis of sewage effluent  
830 discharge temperatures. *Environ Sci (Camb)* 7, 1760–1777. <https://doi.org/10.1039/D1EW00411E>

831 Xiantian, X., Ping, C., Jingfang, W., Jiannan, F., Hui, Z., Xuan, L., Wu, Z., Pei, H., 2020. Evolution Of The Novel  
832 Coronavirus From The Ongoing Wuhan Outbreak And Modeling Of Its Spike Protein For Risk Of Human  
833 Transmission. *Sci China Life Sci* 63, 457–460.

834 Xu, Y., Li, X., Zhu, B., Liang, H., Fang, C., Gong, Y., Guo, Q., Sun, X., Zhao, D., Shen, J., Zhang, H., Liu, H., Xia, H.,  
835 Tang, J., Zhang, K., Gong, S., 2020. Characteristics of pediatric SARS-CoV-2 infection and potential evidence  
836 for persistent fecal viral shedding. *Nat Med* 26, 502–505. <https://doi.org/10.1038/s41591-020-0817-4>

837 Yang, S., Dong, Q., Li, S., Cheng, Z., Kang, X., Ren, D., Xu, C., Zhou, X., Liang, P., Sun, L., Zhao, J., Jiao, Y., Han,  
838 T., Liu, Yanchen, Qian, Y., Liu, Yi, Huang, X., Qu, J., 2022. Persistence of SARS-CoV-2 RNA in wastewater after  
839 the end of the COVID-19 epidemics. *J Hazard Mater* 429, 128358. <https://doi.org/10.1016/j.jhazmat.2022.128358>

840
